# Supplementary material for: Evolution of oxidation dynamics of histidine: non-reactivity in the gas phase, peroxides in hydrated clusters, and pH dependence in solution
Source: Royal Society of Chemistry journal article supplement (doi:10.1039/c4cp03550j), 2014-01-01
Supplement: c4cp03550j1.pdf [file c4cp03550j1.pdf]

Supporting Information

### Evolution of Oxidation Dynamics of Histidine:

#### Non-Reactivity in the Gas Phase, Peroxides in Hydrated Clusters, and pH Dependence in Solution

Fangwei Liu, Wenchao Lu, Yigang Fang,<sup>a</sup> Jianbo Liu\*

Department of Chemistry and Biochemistry

Queens College and the Graduate Center of the City University of New York

65-30 Kissena Blvd., Queens, New York 11367, USA

### Contents

|                                                                                                                                                                                           |     |
|-------------------------------------------------------------------------------------------------------------------------------------------------------------------------------------------|-----|
| Summary of literature proposed His photooxidation pathways, and Fig. S1. ....                                                                                                             | S2  |
| Fig. S2 Stable conformers and tautomers of HisH <sup>+</sup> . ....                                                                                                                       | S4  |
| Fig. S3 Stable conformers and tautomers of HisH <sup>+</sup> (H <sub>2</sub> O) <sub>1,2</sub> . ....                                                                                     | S5  |
| Fig. S4 Stable conformers and tautomers of [His-H] <sup>-</sup> . ....                                                                                                                    | S6  |
| Fig. S5 Stable conformers and tautomers of [His-H](H <sub>2</sub> O) <sub>1,2</sub> . ....                                                                                                | S7  |
| Reactions of <sup>1</sup> O <sub>2</sub> with dihydrated [HisH] <sup>+</sup> (H <sub>2</sub> O) <sub>2</sub> and [His-H] <sup>-</sup> (H <sub>2</sub> O) <sub>2</sub> , and Fig. S6. .... | S8  |
| Fig. S7 UV-Vis absorption spectra of His over the course of the reaction with <sup>1</sup> O <sub>2</sub> at pH 12. ....                                                                  | S10 |
| Cartesian coordinates for all the structures in Figs. S2-S5. ....                                                                                                                         | S11 |
| References .....                                                                                                                                                                          | S40 |

---

\* Author to whom correspondence should be addressed. Electronic mail: jianbo.liu@qc.cuny.edu.

<sup>a</sup> Present address: Chemical Sciences Division, Lawrence Berkeley National Laboratory, Berkeley, CA 94720

### Summary of literature proposed His photooxidation pathways

We have summarized literature proposed oxidation pathways of single His in Fig. S1.<sup>1-4</sup> The photooxidation of His was initiated by the formation of endoperoxide via [4+2] Diels-Alder cycloaddition of <sup>1</sup>O<sub>2</sub> to the conjugated double bonds of the imidazole ring. Note that <sup>1</sup>O<sub>2</sub> does not really favor a Diels-Alder reaction, due to high activation barriers and relatively weak O-C bonding formed. Consequently, the endoperoxides were only detected at low temperature.<sup>2,5</sup> The endoperoxides may in one pathway lose O<sub>2</sub> to regenerate starting materials. In another pathway, the endoperoxides decomposed by ring-opening to a number of poorly characterized intermediates, including hydroperoxides which may eliminate water and be hydrolyzed to hydrated imidazolone. Hydrated imidazolone intermediate (**2a** and/or **2a'**) was assumed to be a key intermediate. Hydrated imidazolone may either undergo intramolecular nucleophilic attack to form 6 $\alpha$ -hydroxy-2-oxo-octahydro-pyrrolo[2,3-d]imidazole-5-carboxylic acid (**2d**), or cross-link with another His molecule to produce a dimeric product (see Fig. 8 of the paper). Hydrated imidazolone may also evolve to hydroxyimidazolidinedione (**4**) via hydration and dehydrogenation. Ring rupture of **4** and subsequent degradation produce various stable end-products, of which asparagine (**6**), aspartic acid (**8**) and urea (**9**) were mostly identified.

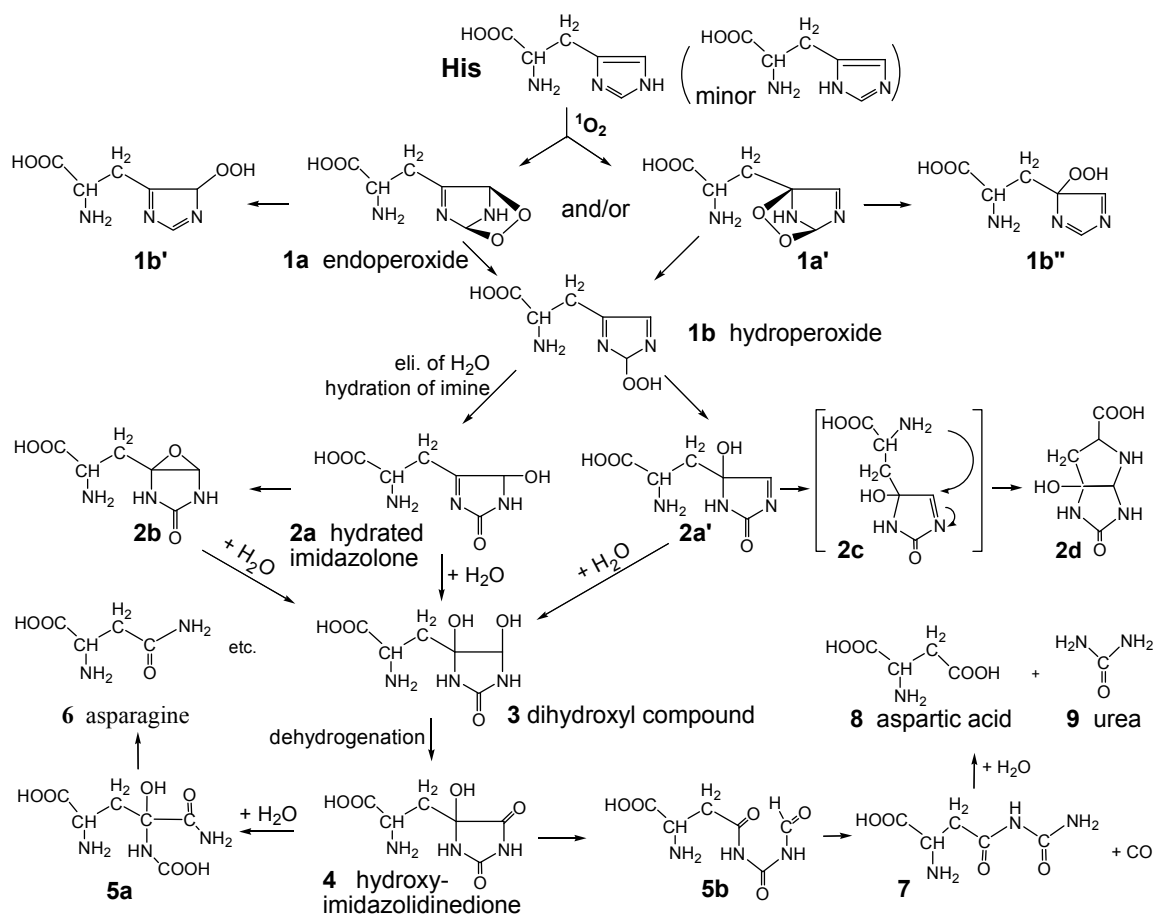

**Fig. S1** Literature proposed photooxidation pathways of histidine. <sup>1-4</sup>

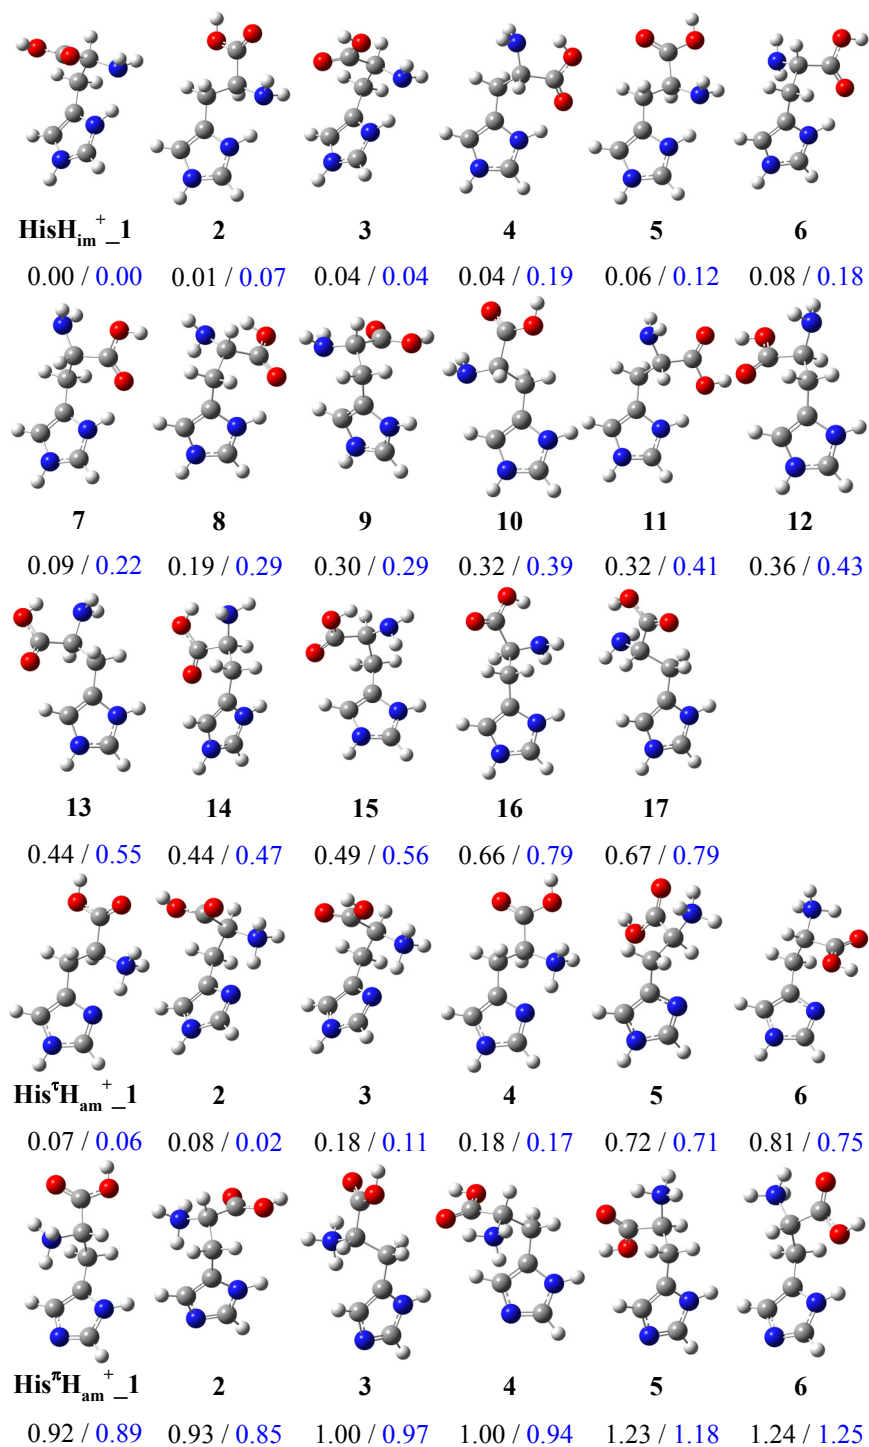

**Fig. S2** Stable conformers and tautomers of HisH<sup>+</sup>. Relative energies (eV) shown before slashes are derived from B3LYP/6-311++G(d,p), followed by the values (in blue) from MP2/6-311++G(d,p).

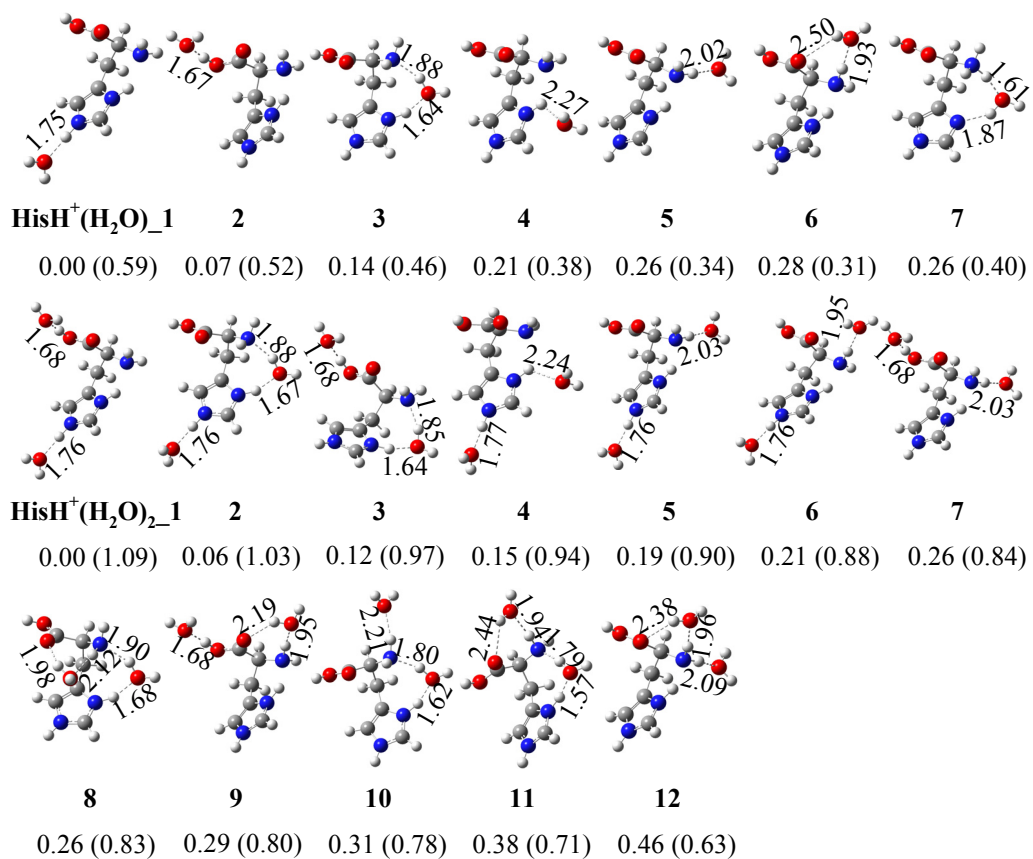

**Fig. S3** Stable conformers and tautomers of HisH<sup>+</sup>(H<sub>2</sub>O)<sub>1,2</sub>. Hydrogen bonds (---) between His and water(s) are shown in Å. B3LYP/6-311++G(d,p) calculated relative energies (eV) are indicated below each structure, along with hydration energies presented in parentheses.

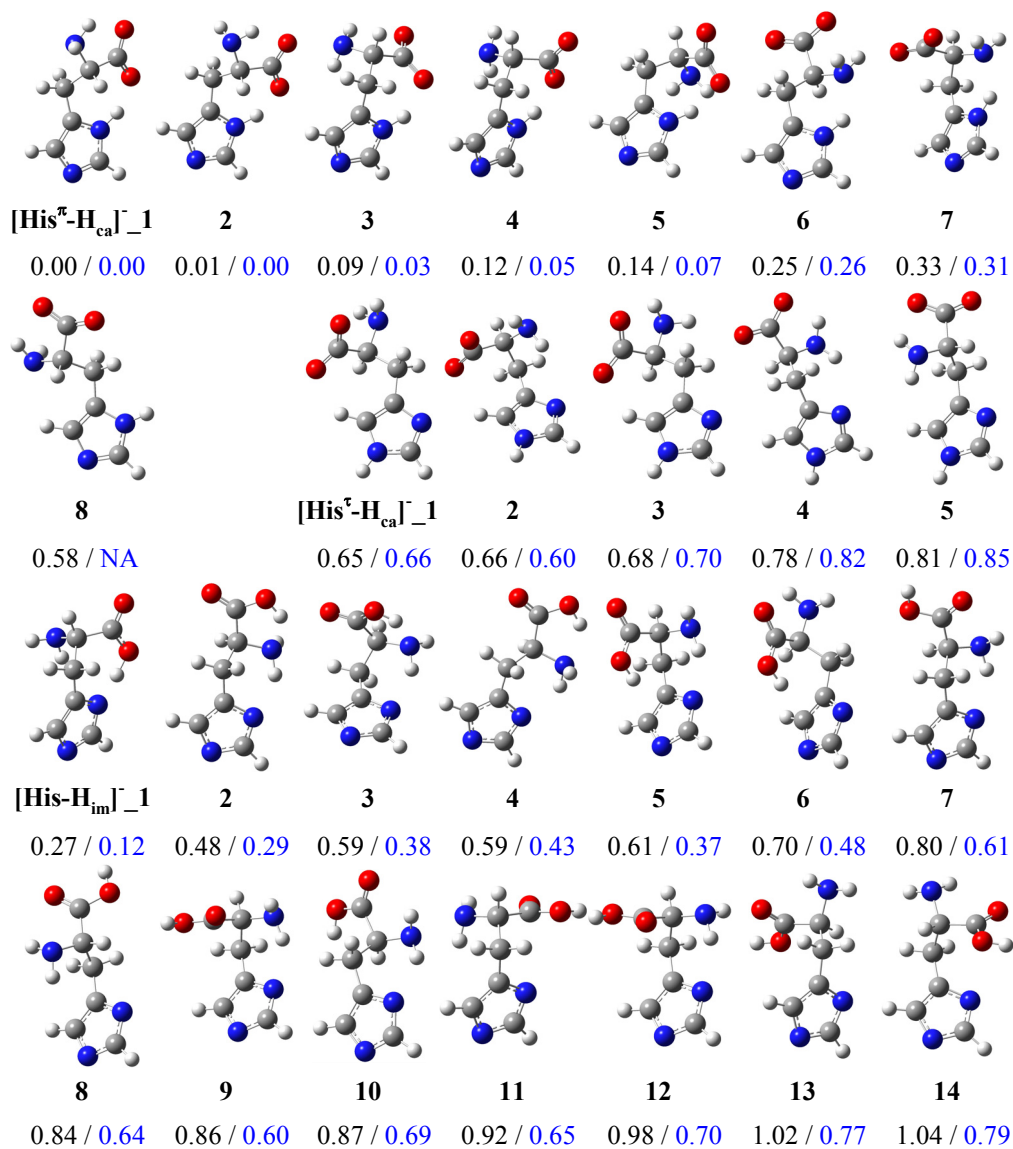

**Fig. S4** Stable conformers and tautomers of [His-H]<sup>-</sup>. Relative energies (eV) shown before slashes are derived from B3LYP/6-311++G(d,p), followed by the values (in blue) from MP2/6-311++G(d,p).

Note that MP2 calculation for [His<sup>n</sup>-H<sub>ca</sub>]<sup>-</sup><sub>8</sub> ran into convergence failure.

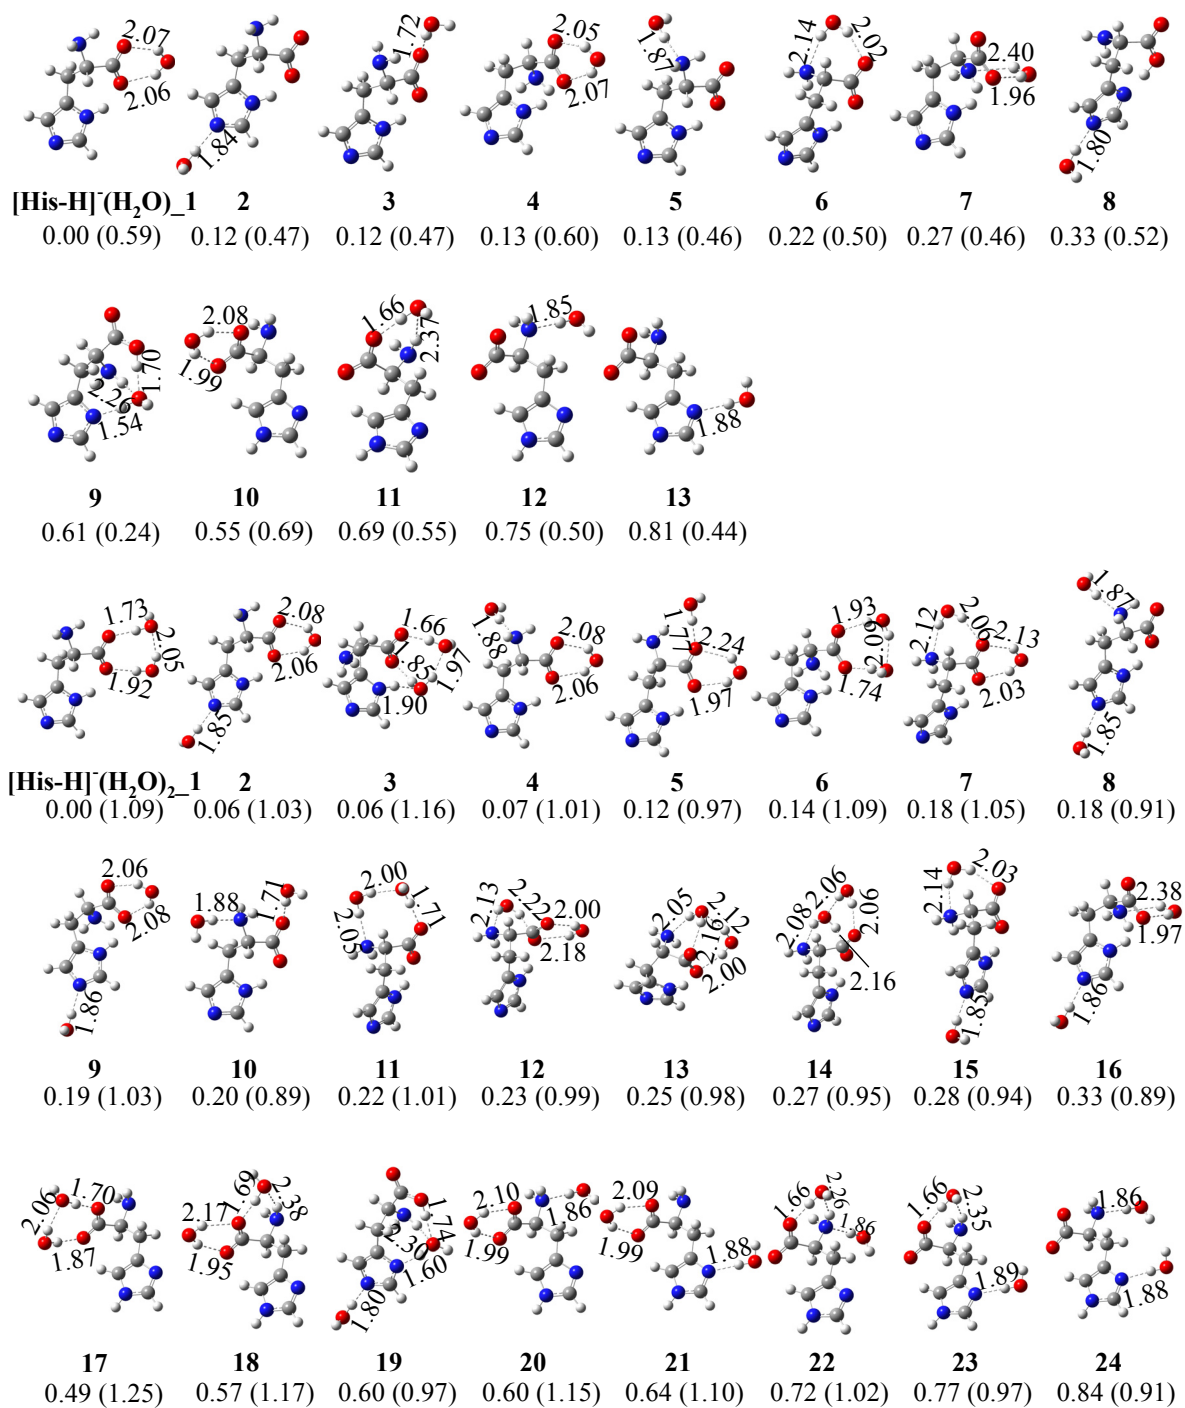

**Fig. S5** Stable conformers and tautomers of  $[\text{His-H}](\text{H}_2\text{O})_{1,2}$ . Hydrogen bonds (---) between His and water(s) are shown in Å. B3LYP/6-311++G(d,p) calculated relative energies (eV) are indicated below each structure, along with hydration energies presented in parentheses.

### The reactions of $^1\text{O}_2$ with dihydrated $[\text{HisH}]^+(\text{H}_2\text{O})_2$ and $[\text{His-H}]^-(\text{H}_2\text{O})_2$

The potential energy surfaces (PESs) associated with the reaction coordinates for  $^1\text{O}_2$  with  $\text{HisH}^+(\text{H}_2\text{O})_2$  and  $[\text{His-H}]^-(\text{H}_2\text{O})_2$  are presented in Fig. S6. Dihydrates follow the similar routes as the corresponding monohydrates. For  $\text{HisH}^+(\text{H}_2\text{O})_2$ , the energetically most favorable pathway is  $\text{HisH}^+(\text{H}_2\text{O})_2 + ^1\text{O}_2 \rightarrow \text{PC}(2\text{W}) \rightarrow \text{TS1}(2\text{W}) \rightarrow \text{HisH-2,5-OO}^+(\text{H}_2\text{O})_{2\_a} \rightarrow \text{HisH-2,5-OO}^+(\text{H}_2\text{O})_{2\_b} \rightarrow \text{TS2}(2\text{W}) \rightarrow \text{His-5-OOH}^+(\text{H}_2\text{O})_2 (m/z 224) \rightarrow \text{His-5-OOH}^+(\text{H}_2\text{O}) (m/z 206) + \text{H}_2\text{O}$ . A large fraction of  $\text{His-5-OOH}^+(\text{H}_2\text{O})$  may undergo secondary reaction, eliminating the remaining water ligand. Consequently,  $\text{His-5-OOH}^+(m/z 188)$  accounts for  $\sim 30\%$  of the total product ions at  $E_{col} \leq 0.1$  eV. Note that the density of states in dihydrates is much higher than that in monohydrates, because dihydrates have more low frequency modes, *e.g.*,  $\text{HisH-2,5-OO}^+(\text{H}_2\text{O})_{2\_a/b}$  have six vibrational modes below  $100 \text{ cm}^{-1}$  and  $\text{His-5-OOH}^+(\text{H}_2\text{O})_2$  has seven. This improves intramolecular vibrational relaxation (IVR) and thus the stability of dihydrates. Consequently, a small fraction ( $\sim 5\%$ ) of  $\text{HisH-2,5-OO}^+(\text{H}_2\text{O})_2$  and/or  $\text{His-5-OOH}^+(\text{H}_2\text{O})_2$  survived intact and were detected (at  $m/z 224$ ) at our lowest  $E_{col}$ .

Just as that for  $[\text{His-H}]^-(\text{H}_2\text{O})$ , the favorable pathway for  $[\text{His-H}]^-(\text{H}_2\text{O})_2$  corresponds to reactants  $\rightarrow \text{PC}^-(2\text{W}) \rightarrow \text{TS1}^-(2\text{W}) \rightarrow [\text{His-H}]^-2,4\text{-OO}^-(\text{H}_2\text{O})_2 \rightarrow [\text{His-H}]^-2,4\text{-OO}^-(\text{H}_2\text{O}) (m/z 204) + \text{H}_2\text{O} \rightarrow [\text{His-H}]^-2,4\text{-OO}^- (m/z 186) + 2\text{H}_2\text{O}$ , and the product ions have 2,4-endoperoxide structures.

The formation and subsequent ring-opening of endoperoxides are site-specific in all hydrated systems: protonated hydrates produce 2,5-endoperoxides and 5-hydroperoxides preferentially, while deprotonated hydrates produce 2,4-endoperoxides and 2-hydroperoxides.



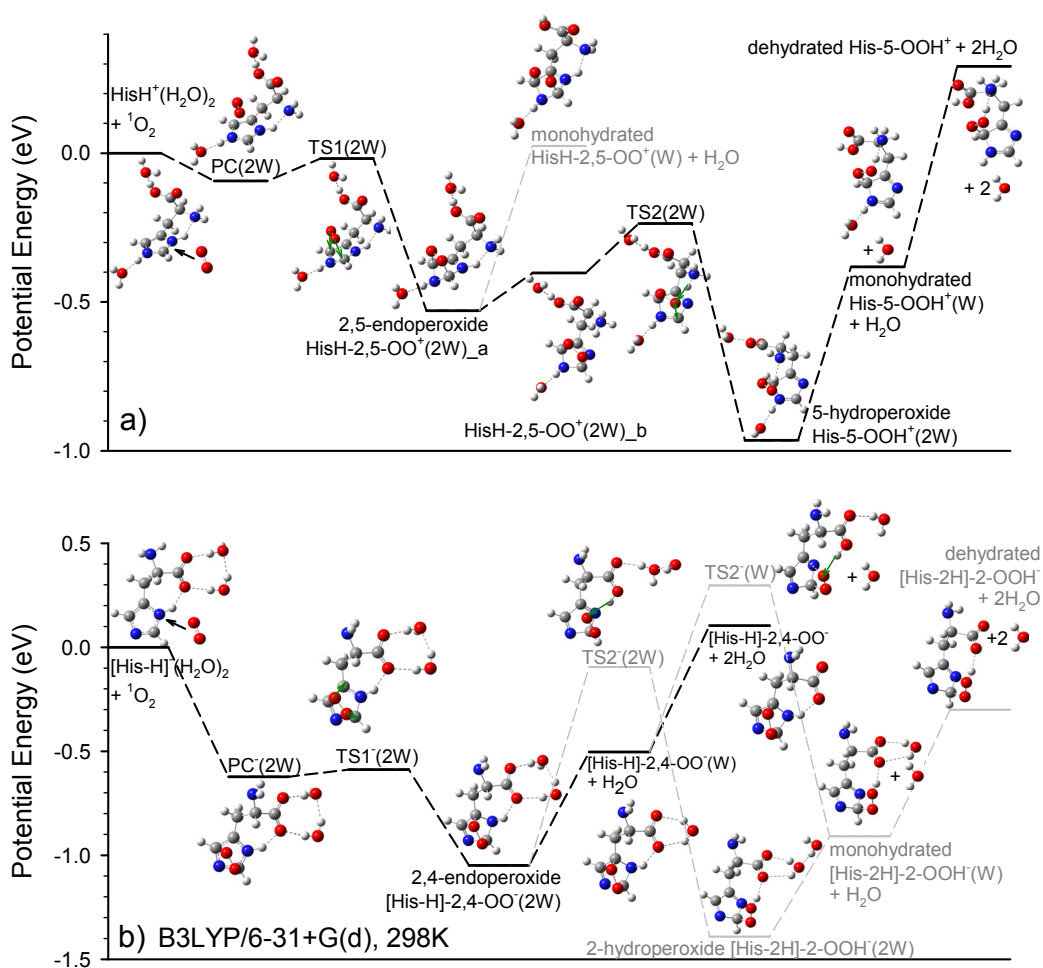

**Fig. S6** Schematic reaction coordinates for a)  $\text{HisH}^+(\text{H}_2\text{O})_2 + {}^1\text{O}_2$  and b)  $[\text{His-H}]^+(\text{H}_2\text{O})_2 + {}^1\text{O}_2$ .

Favorable pathways are indicated by heavy dashed lines. Transition vectors in each TS are indicated by green arrows.

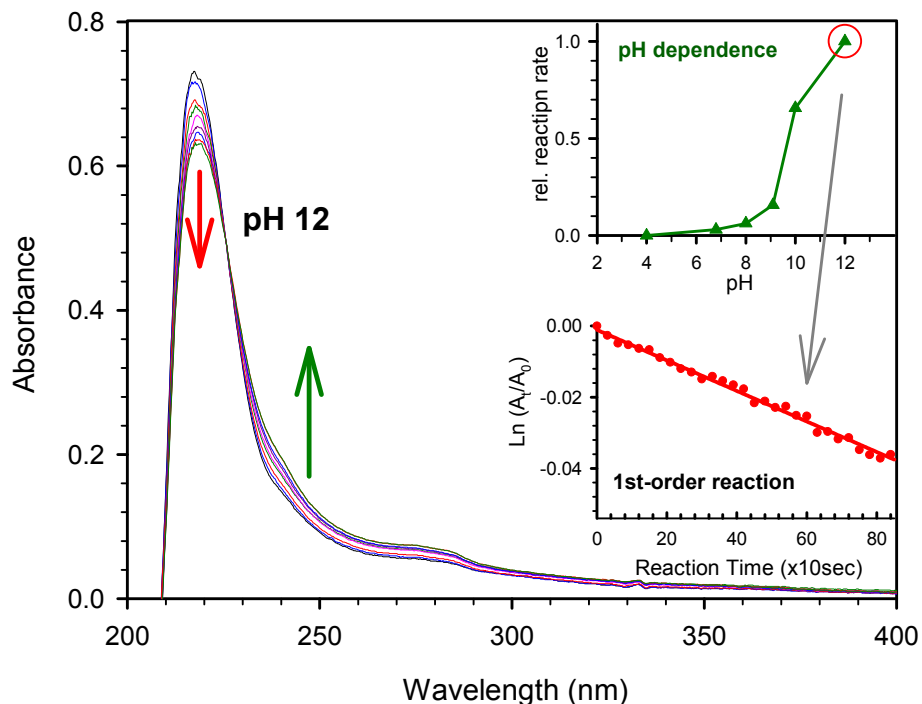

**Fig. S7** UV-Vis absorption spectra of His over the course of the reaction with  $^1\text{O}_2$ , recorded at pH 12.

Spectral changes reveal that the band belonging to His decreased, where the product absorption at wavelength longer than 230 nm increased as a function of reaction time.

Bottom insert: the plot of  $\ln(A_t/A_0)$  as a function of reaction time  $t$  at pH 12, where  $A_t$  and  $A_0$  are the absorbance of His at 218 nm at any time and time zero, respectively. Note the occasional signal drifts from linearity arose mostly from transient cavitation within the flow cell.

Top insert: dependence of relative reaction rate (based on UV-Vis kinetics analysis) on solution pH.

Spectra were measured in 0.1 mM aqueous solution of His prepared in potassium acetate buffer (pH 4.0), phosphate buffer (pH 6.8 and 8.0),  $\text{Na}_2\text{B}_4\text{O}_7/\text{HCl}$  buffer (pH 9.13), borax/NaOH buffer (pH 10.0), or 0.01 M NaOH (pH 12). All chemicals were of the highest purity available and were used without further purification. Control experiments were performed using  $^3\text{O}_2$  under the same conditions, and no obvious spectral changes were observed.

**Cartesian coordinates for all the structures in  
Figures S2, S3, S4 and S5, optimized at  
B3LYP/6-311++G(d,p)**

**HisH<sup>+</sup>**

HisH<sub>im</sub><sup>+</sup>\_1

O1 2.049739 -1.687553 -0.161426  
C2 1.890342 -0.389221 -0.466146  
O3 2.067543 0.080469 -1.559321  
C4 1.474885 0.426031 0.759142  
N5 1.206384 1.811593 0.333114  
C6 0.240697 -0.178709 1.477954  
H7 2.369752 -2.154480 -0.950236  
H8 2.316318 0.359932 1.459928  
H9 1.804888 2.046836 -0.456229  
H10 1.408869 2.465614 1.083266  
C11 -0.993360 -0.182408 0.629044  
H12 0.053517 0.411743 2.381206  
H13 0.462339 -1.195725 1.801561  
C14 -1.999260 -1.089045 0.451522  
N15 -2.886292 -0.525230 -0.450325  
C16 -2.445651 0.680557 -0.824178  
N17 -1.308627 0.902546 -0.174415  
H18 -2.159611 -2.063831 0.878858  
H19 -3.740705 -0.953752 -0.781509  
H20 -2.925034 1.341742 -1.526783  
H21 -0.614759 1.673002 -0.246725

HisH<sub>im</sub><sup>+</sup>\_2

O1 -2.917022 -1.340886 -0.525469  
C2 -2.592479 -0.125100 -0.056103  
O3 -3.333990 0.599242 0.550952  
C4 -1.130521 0.222644 -0.369299  
N5 -0.842170 1.646567 -0.133450  
C6 -0.200862 -0.672582 0.492017  
H7 -3.842224 -1.529940 -0.297900  
H8 -0.951646 -0.001615 -1.424291  
H9 -1.331853 1.949390 0.708865  
H10 -1.235548 2.207719 -0.884977  
C11 1.252078 -0.435063 0.220461  
H12 -0.433322 -1.723043 0.313786  
H13 -0.403698 -0.474573 1.551418  
C14 2.330009 -1.270123 0.138502  
N15 3.434734 -0.468867 -0.096915  
C16 3.057794 0.812198 -0.164461  
N17 1.744022 0.846322 0.031257  
H18 2.407924 -2.339927 0.228477  
H19 4.386418 -0.795323 -0.203149  
H20 3.703484 1.654803 -0.348225

H21 1.056353 1.625666 -0.020809

HisH<sub>im</sub><sup>+</sup>\_3

O1 2.792693 -0.276515 -1.063821  
C2 1.831797 -0.677887 -0.211193  
O3 1.359775 -1.783021 -0.193879  
C4 1.449886 0.444164 0.758120  
N5 1.319800 1.735662 0.043250  
C6 0.150974 0.102454 1.513745  
H7 3.048418 -1.025118 -1.626733  
H8 2.263002 0.470869 1.496737  
H9 2.085698 1.845120 -0.616739  
H10 1.395160 2.505715 0.703631  
C11 -1.051311 -0.004370 0.627994  
H12 -0.021508 0.878878 2.267223  
H13 0.278832 -0.838712 2.048605  
C14 -2.123523 -0.848964 0.625062  
N15 -2.932296 -0.461283 -0.429239  
C16 -2.383688 0.579455 -1.062582  
N17 -1.250689 0.870271 -0.428990  
H18 -2.369122 -1.683178 1.259013  
H19 -3.805955 -0.898617 -0.691458  
H20 -2.786670 1.083608 -1.924934  
H21 -0.510117 1.556076 -0.655756

HisH<sub>im</sub><sup>+</sup>\_4

O1 -3.117562 -0.995311 -0.073139  
C2 -1.821138 -0.804927 -0.020116  
O3 -1.044109 -1.712917 0.216709  
C4 -1.366338 0.649395 -0.318744  
N5 -2.533866 1.522812 -0.218884  
C6 -0.161655 1.097242 0.559326  
H7 -3.521673 -0.111357 -0.245156  
H8 -1.054899 0.638065 -1.369011  
H9 -2.537676 2.269597 -0.903047  
H10 -2.659516 1.925058 0.705109  
C11 1.180725 0.524200 0.213067  
H12 -0.383059 0.880387 1.610689  
H13 -0.079522 2.182399 0.473460  
C14 2.385146 1.134946 0.001643  
N15 3.306718 0.129228 -0.230323  
C16 2.696013 -1.059372 -0.170459  
N17 1.416216 -0.835501 0.099663  
H18 2.663413 2.174824 0.006650  
H19 4.291729 0.262895 -0.418592  
H20 3.160139 -2.020114 -0.321032  
H21 0.614444 -1.500605 0.170883

HisH<sub>im</sub><sup>+</sup>\_5

O1 -3.452510 0.664990 -0.329551

C2 -2.560768 -0.320264 -0.118886  
O3 -2.849375 -1.464060 0.106656  
C4 -1.120878 0.203914 -0.240799  
N5 -0.900820 1.562332 0.296903  
C6 -0.144589 -0.799747 0.402893  
H7 -4.347138 0.290231 -0.284166  
H8 -0.919560 0.252405 -1.317672  
H9 -1.242816 1.625175 1.254281  
H10 -1.439903 2.240299 -0.235383  
C11 1.289392 -0.460699 0.140434  
H12 -0.358348 -1.803178 0.035951  
H13 -0.320434 -0.827698 1.484874  
C14 2.393373 -1.229967 -0.095367  
N15 3.462166 -0.360364 -0.233134  
C16 3.040224 0.900330 -0.095014  
N17 1.731802 0.853142 0.135309  
H18 2.509967 -2.297274 -0.172598  
H19 4.420508 -0.629909 -0.413421  
H20 3.650538 1.785458 -0.163123  
H21 1.029714 1.609880 0.241291

HisH<sub>im</sub><sup>+</sup><sub>6</sub>

O1 -3.335422 -0.471715 0.046769  
C2 -2.014396 -0.501465 -0.102898  
O3 -1.379061 -1.542769 -0.123378  
C4 -1.414803 0.908622 -0.173299  
N5 -1.193219 1.475476 1.153866  
C6 -0.129413 0.973827 -1.031759  
H7 -3.671017 -1.378347 0.147690  
H8 -2.153520 1.537777 -0.673104  
H9 -0.721189 0.841346 1.789473  
H10 -2.056572 1.780959 1.588370  
C11 1.115692 0.390034 -0.438647  
H12 0.068464 2.029309 -1.222475  
H13 -0.317334 0.501839 -2.002100  
C14 2.335256 0.952861 -0.190147  
N15 3.150514 -0.051954 0.300569  
C16 2.464427 -1.197178 0.361446  
N17 1.237918 -0.946141 -0.085291  
H18 2.685588 1.961951 -0.322539  
H19 4.118836 0.054440 0.573645  
H20 2.837858 -2.144689 0.712920  
H21 0.417678 -1.570583 -0.111195

HisH<sub>im</sub><sup>+</sup><sub>7</sub>

O1 -3.149855 -0.889362 -0.191492  
C2 -1.839959 -0.740337 -0.033658  
O3 -1.109689 -1.669155 0.268110  
C4 -1.362645 0.700761 -0.305833  
N5 -2.366360 1.740028 -0.188293

C6 -0.147840 1.078883 0.589429  
H7 -3.384690 -1.820785 -0.042844  
H8 -1.028675 0.689592 -1.351306  
H9 -2.816258 1.742128 0.721763  
H10 -3.092592 1.648009 -0.889205  
C11 1.182795 0.500115 0.223530  
H12 -0.370899 0.835080 1.634101  
H13 -0.063390 2.164104 0.530434  
C14 2.375503 1.114121 -0.038087  
N15 3.301523 0.112243 -0.270355  
C16 2.708292 -1.080299 -0.162426  
N17 1.432773 -0.860816 0.138659  
H18 2.640056 2.157083 -0.069476  
H19 4.279140 0.251654 -0.490226  
H20 3.178862 -2.039618 -0.300335  
H21 0.662373 -1.538770 0.246339

HisH<sub>im</sub><sup>+</sup><sub>8</sub>

O1 2.742676 -0.891171 -0.854944  
C2 1.812009 -0.718205 0.064467  
O3 1.242072 -1.648679 0.596848  
C4 1.526577 0.758110 0.419823  
N5 1.816579 1.586587 -0.744531  
C6 0.156591 0.942142 1.130570  
H7 2.977399 -0.003352 -1.200597  
H8 2.283692 1.004530 1.173110  
H9 2.102802 2.528373 -0.505283  
H10 1.056626 1.633053 -1.415702  
C11 -1.059606 0.439039 0.416474  
H12 0.019949 2.006367 1.331014  
H13 0.210172 0.443250 2.102392  
C14 -2.148564 1.086455 -0.096241  
N15 -3.011834 0.113008 -0.569841  
C16 -2.481971 -1.095829 -0.361996  
N17 -1.309019 -0.916075 0.234572  
H18 -2.389726 2.134612 -0.142745  
H19 -3.911669 0.280401 -1.001284  
H20 -2.923692 -2.040258 -0.634733  
H21 -0.603826 -1.623088 0.478617

HisH<sub>im</sub><sup>+</sup><sub>9</sub>

O1 1.634170 -1.801533 0.092932  
C2 1.850791 -0.555013 -0.385681  
O3 2.245746 -0.327809 -1.496604  
C4 1.559582 0.516125 0.663704  
N5 1.495628 1.819817 0.016642  
C6 0.254930 0.230769 1.452628  
H7 1.928058 -2.435700 -0.580795  
H8 2.381779 0.432799 1.389678  
H9 2.048598 1.815162 -0.836181

H10 1.853366 2.551150 0.621102  
 C11 -0.958943 0.182565 0.578741  
 H12 0.133393 1.025106 2.194037  
 H13 0.352992 -0.707503 2.001728  
 C14 -1.449158 1.060442 -0.348123  
 N15 -2.600155 0.497249 -0.869812  
 C16 -2.830401 -0.684872 -0.299591  
 N17 -1.845498 -0.888747 0.578350  
 H18 -1.054735 2.007365 -0.670730  
 H19 -3.186197 0.914104 -1.582004  
 H20 -3.652583 -1.349154 -0.507159  
 H21 -1.754625 -1.716926 1.153376

#### HisH<sub>im</sub><sup>+</sup><sub>10</sub>

O1 -2.789177 -1.440810 -0.517917  
 C2 -2.608878 -0.181250 -0.071129  
 O3 -3.448884 0.467635 0.489312  
 C4 -1.179791 0.313022 -0.352134  
 N5 -1.011851 1.741216 -0.134713  
 C6 -0.196973 -0.488049 0.540970  
 H7 -3.700219 -1.712972 -0.320347  
 H8 -0.956257 0.083587 -1.397800  
 H9 -1.528750 2.027248 0.694749  
 H10 -1.413479 2.266864 -0.905104  
 C11 1.239274 -0.191221 0.242826  
 H12 -0.380986 -1.557688 0.414419  
 H13 -0.402337 -0.251009 1.590874  
 C14 1.909892 0.979708 0.022131  
 N15 3.237723 0.652610 -0.189902  
 C16 3.404192 -0.666189 -0.104745  
 N17 2.204051 -1.190688 0.156293  
 H18 1.532686 1.986490 -0.004149  
 H19 3.980653 1.312865 -0.381307  
 H20 4.327890 -1.207153 -0.225776  
 H21 2.029525 -2.180928 0.274027

#### HisH<sub>im</sub><sup>+</sup><sub>11</sub>

O1 -1.199484 -1.742591 -0.038526  
 C2 -2.049892 -0.655154 -0.005073  
 O3 -3.199690 -0.767942 0.293481  
 C4 -1.343896 0.658343 -0.383128  
 N5 -2.246086 1.785445 -0.468528  
 C6 -0.197416 0.991362 0.628758  
 H7 -1.721334 -2.530039 0.190222  
 H8 -0.899721 0.508491 -1.372737  
 H9 -2.849318 1.843981 0.347211  
 H10 -2.853464 1.713509 -1.277766  
 C11 1.158822 0.468618 0.280431  
 H12 -0.469610 0.663264 1.638034  
 H13 -0.133418 2.079383 0.658018

C14 2.359019 1.114368 0.182345  
 N15 3.306278 0.161721 -0.149601  
 C16 2.722815 -1.032803 -0.262038  
 N17 1.427744 -0.864015 -0.002327  
 H18 2.612928 2.151130 0.321822  
 H19 4.293144 0.335661 -0.290962  
 H20 3.210171 -1.958577 -0.519403  
 H21 0.691759 -1.572997 -0.038652

#### HisH<sub>im</sub><sup>+</sup><sub>12</sub>

O1 -2.767484 -1.052934 -0.947312  
 C2 -1.794589 -0.740662 -0.079005  
 O3 -1.329332 -1.522166 0.717909  
 C4 -1.384570 0.732722 -0.211890  
 N5 -2.457121 1.663408 0.120594  
 C6 -0.169088 1.048936 0.688192  
 H7 -3.038100 -1.973672 -0.801183  
 H8 -1.123228 0.902690 -1.261479  
 H9 -2.852883 1.480692 1.038149  
 H10 -3.208883 1.625827 -0.558894  
 C11 1.110953 0.374661 0.307941  
 H12 -0.410958 0.777923 1.718462  
 H13 -0.032531 2.132248 0.664719  
 C14 1.569365 -0.900449 0.490335  
 N15 2.839381 -0.959053 -0.053500  
 C16 3.175175 0.226768 -0.560340  
 N17 2.139556 1.042848 -0.351481  
 H18 1.086840 -1.747064 0.946652  
 H19 3.434563 -1.777735 -0.066544  
 H20 4.104638 0.479333 -1.042906  
 H21 2.118889 2.018280 -0.622437

#### HisH<sub>im</sub><sup>+</sup><sub>13</sub>

O1 -3.202130 -0.944282 -0.288521  
 C2 -1.913330 -0.786818 -0.024418  
 O3 -1.204098 -1.686386 0.354996  
 C4 -1.376345 0.643278 -0.276398  
 N5 -2.481651 1.589144 -0.175976  
 C6 -0.156012 0.956276 0.637835  
 H7 -3.565883 -0.058946 -0.499724  
 H8 -1.046659 0.647319 -1.321437  
 H9 -2.357554 2.423213 -0.736688  
 H10 -2.700094 1.860164 0.777971  
 C11 1.147193 0.314799 0.256128  
 H12 -0.398548 0.676566 1.667369  
 H13 -0.013540 2.040563 0.630965  
 C14 1.545972 -0.986840 0.119268  
 N15 2.885617 -0.968058 -0.219924  
 C16 3.324178 0.287301 -0.296570  
 N17 2.284153 1.075306 -0.013549

H18 0.974915 -1.891271 0.235213  
 H19 3.455830 -1.787536 -0.388353  
 H20 4.323525 0.606684 -0.541324  
 H21 2.331072 2.085871 0.015274

HisH<sub>im</sub><sup>+</sup>\_14

O1 2.687246 1.437173 0.267007  
 C2 1.510525 0.937240 -0.074847  
 O3 0.506548 1.599338 -0.182272  
 C4 1.512008 -0.584699 -0.373687  
 N5 2.806596 -1.169970 -0.037835  
 C6 0.321042 -1.307908 0.321437  
 H7 3.325635 0.689912 0.253163  
 H8 1.388632 -0.651917 -1.459766  
 H9 3.167994 -1.800710 -0.742227  
 H10 2.825231 -1.638348 0.861805  
 C11 -1.019260 -0.655436 0.203816  
 H12 0.539802 -1.392606 1.389552  
 H13 0.271465 -2.330552 -0.066339  
 C14 -1.860013 -0.194089 1.173637  
 N15 -2.956373 0.356745 0.536097  
 C16 -2.815976 0.240091 -0.782182  
 N17 -1.659942 -0.388665 -0.999253  
 H18 -1.757274 -0.185696 2.244729  
 H19 -3.745813 0.795327 0.992723  
 H20 -3.507736 0.584067 -1.532951  
 H21 -1.280215 -0.559525 -1.920672

HisH<sub>im</sub><sup>+</sup>\_15

O1 2.768514 -0.752928 -0.958685  
 C2 1.916447 -0.658137 0.056719  
 O3 1.506711 -1.615991 0.663383  
 C4 1.500880 0.787435 0.415252  
 N5 1.615794 1.637956 -0.761818  
 C6 0.160337 0.791820 1.199966  
 H7 2.895579 0.145698 -1.323476  
 H8 2.262602 1.129611 1.124542  
 H9 1.792737 2.611945 -0.549380  
 H10 0.840753 1.565821 -1.411909  
 C11 -1.020641 0.214884 0.480029  
 H12 -0.063146 1.819497 1.498813  
 H13 0.309390 0.217202 2.116181  
 C14 -1.339776 -1.073138 0.143972  
 N15 -2.575128 -1.037904 -0.474518  
 C16 -3.026318 0.214396 -0.529042  
 N17 -2.095176 0.985017 0.040153  
 H18 -0.784822 -1.982616 0.300217  
 H19 -3.073140 -1.844025 -0.831848  
 H20 -3.961865 0.543103 -0.950289  
 H21 -2.183889 1.986070 0.161473

HisH<sub>im</sub><sup>+</sup>\_16

O1 -3.603212 0.361482 -0.310910  
 C2 -2.560533 -0.421848 -0.046098  
 O3 -2.657810 -1.567505 0.299210  
 C4 -1.174766 0.252258 -0.275461  
 N5 -1.304914 1.702690 -0.276516  
 C6 -0.157631 -0.373147 0.716584  
 H7 -3.259080 1.245966 -0.542921  
 H8 -0.898257 -0.046583 -1.292208  
 H9 -0.696409 2.197017 -0.914448  
 H10 -1.303204 2.136492 0.639511  
 C11 1.268671 -0.273322 0.294810  
 H12 -0.413636 -1.429230 0.821107  
 H13 -0.289914 0.075401 1.706865  
 C14 2.058309 -1.156449 -0.388016  
 N15 3.304356 -0.572738 -0.527429  
 C16 3.309553 0.628844 0.046636  
 N17 2.085145 0.827438 0.543521  
 H18 1.838925 -2.139381 -0.769224  
 H19 4.104336 -0.993938 -0.983678  
 H20 4.144147 1.307983 0.104679  
 H21 1.807537 1.654711 1.056164

HisH<sub>im</sub><sup>+</sup>\_17

O1 -3.640242 0.379078 0.043172  
 C2 -2.579995 -0.373463 -0.234657  
 O3 -2.645674 -1.519256 -0.588622  
 C4 -1.217821 0.371273 -0.112305  
 N5 -1.364116 1.559911 0.719891  
 C6 -0.144651 -0.655393 0.304743  
 H7 -3.311389 1.251041 0.340993  
 H8 -1.016461 0.710693 -1.134700  
 H9 -0.767367 2.334346 0.460482  
 H10 -1.267031 1.379269 1.713542  
 C11 1.267143 -0.237735 0.052626  
 H12 -0.349746 -1.584244 -0.238751  
 H13 -0.268439 -0.890131 1.368099  
 C14 1.839091 0.628550 -0.836682  
 N15 3.211206 0.554158 -0.660071  
 C16 3.497142 -0.319605 0.301592  
 N17 2.334514 -0.804009 0.744531  
 H18 1.401343 1.271989 -1.579555  
 H19 3.901527 1.081573 -1.180145  
 H20 4.479513 -0.582784 0.658132  
 H21 2.248703 -1.502507 1.473150

His<sup>t</sup>H<sub>am</sub><sup>+</sup>\_1

O1 -2.992699 -1.319904 -0.445021  
 C2 -2.578358 -0.121549 -0.043479  
 O3 -3.232272 0.694377 0.553702

C4 -1.111929 0.110476 -0.406556  
 N5 -0.825578 1.574603 -0.182934  
 C6 -0.160184 -0.747206 0.457565  
 H7 -3.918189 -1.451997 -0.178106  
 H8 -0.948267 -0.100323 -1.464572  
 H9 -1.325319 1.892472 0.655454  
 H10 0.245564 1.667320 -0.072754  
 H11 -1.158580 2.147891 -0.959804  
 C12 1.285790 -0.436979 0.195765  
 H13 -0.398544 -0.581097 1.515629  
 H14 -0.373192 -1.796064 0.247540  
 C15 2.371977 -1.262856 0.091282  
 N16 3.451407 -0.425429 -0.094458  
 C17 3.005140 0.851955 -0.104914  
 N18 1.697783 0.880166 0.071139  
 H19 2.474855 -2.333898 0.136856  
 H20 4.413110 -0.715164 -0.202906  
 H21 3.648427 1.706654 -0.240987

#### His<sup>t</sup>H<sub>am</sub><sup>+</sup>\_2

O1 2.086117 -1.673348 -0.217072  
 C2 1.952646 -0.369047 -0.435382  
 O3 2.246503 0.211872 -1.448922  
 C4 1.413876 0.358862 0.802085  
 N5 1.119269 1.769068 0.347826  
 C6 0.168722 -0.278255 1.451867  
 H7 2.474741 -2.094064 -1.002378  
 H8 2.229536 0.394662 1.529020  
 H9 1.719025 1.987692 -0.458333  
 H10 0.083650 1.775144 0.026780  
 H11 1.261631 2.455654 1.088350  
 C12 -1.046095 -0.219866 0.571841  
 H13 0.414370 -1.308906 1.708747  
 H14 -0.023834 0.242776 2.396825  
 C15 -2.024171 -1.144659 0.325180  
 N16 -2.914672 -0.518174 -0.520778  
 C17 -2.464097 0.734066 -0.766174  
 N18 -1.336223 0.948411 -0.116389  
 H19 -2.167685 -2.155735 0.667003  
 H20 -3.762705 -0.922701 -0.891775  
 H21 -2.973597 1.435544 -1.407404

#### His<sup>t</sup>H<sub>am</sub><sup>+</sup>\_3

O1 2.447407 0.192073 -1.291147  
 C2 1.890835 -0.582237 -0.335011  
 O3 1.821858 -1.773877 -0.363666  
 C4 1.404311 0.257477 0.853402  
 N5 1.182458 1.696637 0.430888  
 C6 0.121195 -0.309217 1.484726  
 H7 2.794816 -0.370395 -2.003173

H8 2.217549 0.246984 1.584395  
 H9 1.879966 1.987289 -0.258460  
 H10 1.218121 2.329779 1.231182  
 C11 -1.068686 -0.194071 0.575172  
 H12 -0.062422 0.217760 2.428376  
 H13 0.312514 -1.352452 1.737453  
 C14 -2.110977 -1.050611 0.350024  
 N15 -2.927045 -0.405444 -0.554833  
 C16 -2.372728 0.790785 -0.856355  
 N17 -1.246779 0.951928 -0.186186  
 H18 -2.338253 -2.030046 0.735465  
 H19 -3.792998 -0.765157 -0.930647  
 H20 -2.808880 1.492990 -1.548709  
 H21 0.181327 1.723081 0.001786

#### His<sup>t</sup>H<sub>am</sub><sup>+</sup>\_4

O1 -3.328395 0.710676 0.222553  
 C2 -2.553906 -0.332847 -0.142053  
 O3 -2.928562 -1.456068 -0.299709  
 C4 -1.097878 0.087481 -0.345252  
 N5 -0.860046 1.539562 0.007421  
 C6 -0.125922 -0.800851 0.454073  
 H7 -4.245881 0.407405 0.328797  
 H8 -0.877979 -0.004201 -1.412013  
 H9 -1.231542 1.760582 0.933943  
 H10 -1.310029 2.172560 -0.655430  
 C11 1.308380 -0.440480 0.189419  
 H12 -0.326779 -1.836659 0.179058  
 H13 -0.356442 -0.711757 1.523628  
 C14 2.420662 -1.228848 0.073380  
 N15 3.469257 -0.356286 -0.127226  
 C16 2.981655 0.905241 -0.135076  
 N17 1.675761 0.889840 0.056653  
 H18 2.558835 -2.296015 0.116195  
 H19 4.438222 -0.614623 -0.249765  
 H20 3.594255 1.780458 -0.281454  
 H21 0.220237 1.655399 0.009397

#### His<sup>t</sup>H<sub>am</sub><sup>+</sup>\_5

O1 1.138266 1.813624 -0.103992  
 C2 1.953139 0.775436 -0.155740  
 O3 3.160338 0.820789 -0.226638  
 C4 1.207091 -0.559826 -0.140331  
 N5 2.309519 -1.602050 -0.022457  
 C6 0.124055 -0.737923 0.944042  
 H7 1.655586 2.636100 -0.148916  
 H8 0.729195 -0.708276 -1.113956  
 H9 3.191473 -1.136189 -0.308342  
 H10 2.429632 -1.921350 0.942660  
 H11 2.128349 -2.419849 -0.608277

C12 -1.211988 -0.311228 0.412024  
 H13 0.080575 -1.805225 1.199742  
 H14 0.383241 -0.195914 1.856692  
 C15 -2.234567 0.364375 1.024720  
 N16 -3.236074 0.421664 0.081288  
 C17 -2.786225 -0.201237 -1.042163  
 N18 -1.564005 -0.656184 -0.873073  
 H19 -2.343388 0.789669 2.008306  
 H20 -4.140304 0.854405 0.201167  
 H21 -3.378296 -0.290258 -1.939645

#### His<sup>π</sup>H<sub>am</sub><sup>+</sup><sub>6</sub>

O1 -0.904924 1.609181 0.997700  
 C2 -1.600710 0.851402 0.175069  
 O3 -2.363984 1.220699 -0.685978  
 C4 -1.390064 -0.646965 0.435085  
 N5 -2.699491 -1.272547 -0.033588  
 C6 -0.238122 -1.268671 -0.392507  
 H7 -0.987582 2.541905 0.735043  
 H8 -1.271634 -0.847471 1.499355  
 H9 -3.040416 -0.664540 -0.802708  
 H10 -2.573005 -2.229830 -0.370838  
 H11 -3.416135 -1.276929 0.697000  
 C12 1.090124 -0.609861 -0.198234  
 H13 -0.171139 -2.328554 -0.127342  
 H14 -0.505963 -1.199184 -1.453698  
 C15 2.200425 -1.068267 0.467324  
 N16 3.150680 -0.092005 0.285502  
 C17 2.589774 0.896853 -0.468211  
 N18 1.345411 0.613574 -0.775631  
 H19 2.401983 -1.972179 1.018076  
 H20 4.099713 -0.115234 0.629036  
 H21 3.130684 1.782879 -0.762837

#### His<sup>π</sup>H<sub>am</sub><sup>+</sup><sub>1</sub>

O1 3.051396 -1.303623 -0.019660  
 C2 2.562727 -0.073205 0.022559  
 O3 3.142112 0.944489 -0.264055  
 C4 1.094716 -0.070879 0.448526  
 N5 0.756205 1.367797 0.756920  
 C6 0.160285 -0.592800 -0.687006  
 H7 3.973659 -1.286943 -0.329296  
 H8 0.954427 -0.653709 1.358603  
 H9 1.385041 1.968764 0.198813  
 H10 -0.239090 1.539677 0.515469  
 H11 0.902714 1.604269 1.740922  
 C12 -1.276928 -0.303785 -0.413545  
 H13 0.444649 -0.113374 -1.628295  
 H14 0.360366 -1.660076 -0.804578  
 C15 -2.054206 0.781178 -0.769524

N16 -3.307714 0.685512 -0.219709  
 C17 -3.310097 -0.435046 0.458865  
 N18 -2.098837 -1.070843 0.393822  
 H19 -1.797899 1.588308 -1.443100  
 H20 -1.893153 -1.983982 0.774113  
 H21 -4.145350 -0.839902 1.010579

#### His<sup>π</sup>H<sub>am</sub><sup>+</sup><sub>2</sub>

O1 2.251406 -1.397912 0.586577  
 C2 1.993153 -0.388743 -0.235383  
 O3 2.237420 -0.350968 -1.414869  
 C4 1.355238 0.797557 0.499641  
 N5 0.944842 1.754149 -0.595192  
 C6 0.139844 0.459928 1.406836  
 H7 2.724298 -2.099849 0.106695  
 H8 2.140803 1.275411 1.089556  
 H9 -0.068574 1.611098 -0.784953  
 H10 1.106000 2.734371 -0.356869  
 H11 1.469296 1.503238 -1.450957  
 C12 -1.083993 0.100856 0.630573  
 H13 0.450769 -0.332721 2.089920  
 H14 -0.075079 1.335145 2.025363  
 C15 -2.095777 0.899320 0.133228  
 N16 -2.991373 0.157832 -0.594685  
 C17 -2.549254 -1.074364 -0.546404  
 N18 -1.385977 -1.168575 0.169384  
 H19 -2.262225 1.952543 0.318084  
 H20 -0.905188 -2.025520 0.403403  
 H21 -3.018425 -1.933839 -1.001401

#### His<sup>π</sup>H<sub>am</sub><sup>+</sup><sub>3</sub>

O1 3.067128 -1.042108 0.785102  
 C2 2.579731 -0.088756 0.006327  
 O3 3.138689 0.448366 -0.916646  
 C4 1.139398 0.259730 0.386225  
 N5 0.822534 1.549768 -0.337229  
 C6 0.148508 -0.847037 -0.041069  
 H7 3.971095 -1.271955 0.507975  
 H8 1.058531 0.452292 1.456331  
 H9 1.323404 1.553114 -1.238439  
 H10 -0.201631 1.611059 -0.467827  
 H11 1.137769 2.373076 0.182168  
 C12 -1.277534 -0.391509 0.054444  
 H13 0.378273 -1.161435 -1.065586  
 H14 0.349787 -1.709092 0.602121  
 C15 -1.923418 0.480760 0.908090  
 N16 -3.258589 0.561894 0.605106  
 C17 -3.440493 -0.249046 -0.407990  
 N18 -2.271584 -0.845354 -0.792967  
 H19 -1.516732 1.026360 1.748936



H20 -2.171723 -1.530949 -1.528201  
H21 -4.378990 -0.441539 -0.905652

His<sup>π</sup>H<sub>am</sub><sup>+</sup>\_4

O1 -2.340229 -0.384914 -1.509567  
C2 -2.108874 -0.333644 -0.208920  
O3 -2.473724 -1.129909 0.620104  
C4 -1.330709 0.934266 0.180668  
N5 -1.002582 0.753263 1.646495  
C6 -0.063426 1.232234 -0.646348  
H7 -2.865425 -1.175044 -1.725003  
H8 -2.028418 1.770548 0.097098  
H9 -0.043260 0.364751 1.713065  
H10 -1.058644 1.619555 2.184478  
H11 -1.654100 0.046490 2.029862  
C12 1.090097 0.334035 -0.306171  
H13 -0.350690 1.153936 -1.699116  
H14 0.216687 2.277674 -0.481671  
C15 1.172147 -0.976603 0.124393  
N16 2.480759 -1.354591 0.291342  
C17 3.195496 -0.306969 -0.036070  
N18 2.405766 0.750391 -0.394183  
H19 0.372989 -1.685530 0.292158  
H20 2.733039 1.650393 -0.715716  
H21 4.273457 -0.247549 -0.030347

His<sup>π</sup>H<sub>am</sub><sup>+</sup>\_5

O1 0.793875 1.620787 -0.917012  
C2 1.602979 0.882500 -0.185877  
O3 2.436475 1.270254 0.598795  
C4 1.385842 -0.618545 -0.413312  
N5 2.711172 -1.246150 -0.002543  
C6 0.258771 -1.208959 0.484272  
H7 0.905951 2.563325 -0.701017  
H8 1.215775 -0.833879 -1.467595  
H9 2.591780 -2.183749 0.390245  
H10 3.377225 -1.303771 -0.777832  
H11 3.117615 -0.610190 0.710514  
C12 -1.076507 -0.571712 0.317251  
H13 0.212931 -2.287830 0.285288  
H14 0.556768 -1.084919 1.530848  
C15 -1.729990 0.345113 1.105991  
N16 -2.940869 0.680492 0.561642  
C17 -3.039526 -0.019847 -0.542588  
N18 -1.933249 -0.796632 -0.749591  
H19 -1.395096 0.771157 2.040806  
H20 -1.818581 -1.459946 -1.501363  
H21 -3.875952 -0.013806 -1.225140

His<sup>π</sup>H<sub>am</sub><sup>+</sup>\_6

O1 1.200516 1.781608 -0.014269

C2 2.001491 0.731818 -0.133675  
O3 3.207203 0.766218 -0.160838  
C4 1.235321 -0.592864 -0.255785  
N5 2.324644 -1.653440 -0.134762  
C6 0.091902 -0.842347 0.766722  
H7 1.736419 2.593899 0.017929  
H8 0.841410 -0.666743 -1.272075  
H9 2.413963 -1.988275 0.829666  
H10 2.147283 -2.461378 -0.735871  
H11 3.224112 -1.204990 -0.387571  
C12 -1.257261 -0.396265 0.309313  
H13 0.019288 -1.923959 0.921661  
H14 0.366303 -0.404134 1.733082  
C15 -2.310629 -1.135948 -0.178043  
N16 -3.380476 -0.330691 -0.461092  
C17 -2.999213 0.885842 -0.150344  
N18 -1.718912 0.908562 0.324765  
H19 -2.359107 -2.206041 -0.320365  
H20 -1.201268 1.726470 0.607085  
H21 -3.596621 1.780106 -0.244188

**HisH<sup>+</sup>(H<sub>2</sub>O)<sub>1,2</sub>**HisH<sup>+</sup>(H<sub>2</sub>O)<sub>1</sub>

O1 -2.255263 1.980726 0.233099  
 C2 -2.318906 0.815727 -0.434308  
 O3 -2.443519 0.724016 -1.627462  
 C4 -2.240300 -0.379240 0.515421  
 N5 -2.189640 -1.614840 -0.284979  
 C6 -1.025616 -0.292056 1.475020  
 H7 -2.367666 2.705845 -0.402316  
 H8 -3.142586 -0.320508 1.137489  
 H9 -2.702756 -1.478960 -1.153467  
 H10 -2.621048 -2.386234 0.214772  
 C11 0.294414 -0.319293 0.768263  
 H12 -1.083879 -1.140287 2.165560  
 H13 -1.095136 0.614153 2.076925  
 C14 1.463293 0.364308 0.953907  
 N15 2.359728 -0.097494 0.008477  
 C16 1.768986 -1.027722 -0.741664  
 N17 0.524262 -1.180518 -0.292341  
 H18 1.728791 1.125216 1.667311  
 H19 3.336155 0.220027 -0.107551  
 H20 2.219000 -1.554972 -1.565985  
 H21 -0.264131 -1.739145 -0.658357  
 O22 4.998051 0.722880 -0.335241  
 H23 5.775002 0.361613 0.106633  
 H24 5.312425 1.451896 -0.882117

HisH<sup>+</sup>(H<sub>2</sub>O)<sub>2</sub>

O1 1.918188 -0.328464 0.964372  
 C2 1.521372 0.489303 0.001350  
 O3 1.894616 0.445603 -1.150835  
 C4 0.534022 1.546863 0.508565  
 N5 -0.022266 2.270071 -0.651434  
 C6 -0.594538 0.934789 1.376300  
 H7 2.595289 -0.962718 0.596593  
 H8 1.118704 2.204334 1.164001  
 H9 0.675181 2.287000 -1.393763  
 H10 -0.245294 3.230604 -0.408922  
 C11 -1.472168 -0.008531 0.614048  
 H12 -1.205082 1.753892 1.771265  
 H13 -0.159730 0.415672 2.230076  
 C14 -2.047754 -1.207640 0.923686  
 N15 -2.767331 -1.601257 -0.192381  
 C16 -2.637457 -0.686610 -1.159582  
 N17 -1.865034 0.282880 -0.682813  
 H18 -2.007591 -1.803819 1.818782  
 H19 -3.311149 -2.450140 -0.272545  
 H20 -3.076216 -0.736012 -2.142099  
 H21 -1.446759 1.124168 -1.134382

O22 3.636124 -1.909093 -0.301820  
 H23 3.752549 -1.494876 -1.165961  
 H24 4.480233 -2.303373 -0.056600

HisH<sup>+</sup>(H<sub>2</sub>O)<sub>3</sub>

O1 2.730032 -1.257166 0.502483  
 C2 2.123725 -0.385165 -0.321551  
 O3 2.067576 -0.510442 -1.517508  
 C4 1.474935 0.767718 0.449296  
 N5 1.065938 1.843846 -0.465962  
 C6 0.304250 0.236161 1.332435  
 H7 3.147632 -1.951922 -0.032295  
 H8 2.216595 1.154980 1.151431  
 H9 0.994009 1.460467 -1.408960  
 H10 1.800810 2.544016 -0.515121  
 C11 -0.793011 -0.479115 0.605790  
 H12 -0.115571 1.087451 1.872192  
 H13 0.721855 -0.445878 2.074746  
 C14 -1.016029 -1.815714 0.422208  
 N15 -2.179114 -1.932012 -0.315097  
 C16 -2.662626 -0.713055 -0.577024  
 N17 -1.840833 0.174034 -0.029133  
 H18 -0.461621 -2.675487 0.756708  
 H19 -2.608784 -2.798986 -0.609162  
 H20 -3.560866 -0.494814 -1.130373  
 H21 -1.938651 1.218785 -0.059464  
 O22 -1.511067 2.794984 0.064168  
 H23 -1.848995 3.672176 -0.139473  
 H24 -0.548142 2.744149 -0.148945

HisH<sup>+</sup>(H<sub>2</sub>O)<sub>4</sub>

O1 2.714753 -0.896167 -0.842924  
 C2 2.082767 0.264948 -0.596352  
 O3 1.890690 1.118825 -1.422428  
 C4 1.660262 0.372511 0.867783  
 N5 0.879485 1.601800 1.049078  
 C6 0.845041 -0.859371 1.335643  
 H7 3.012723 -0.894008 -1.766688  
 H8 2.594783 0.371339 1.444324  
 H9 1.194475 2.310863 0.391749  
 H10 0.997625 1.970128 1.987341  
 C11 -0.427833 -1.060118 0.573925  
 H12 0.613522 -0.720511 2.396908  
 H13 1.452672 -1.761141 1.255928  
 C14 -1.013456 -2.186598 0.069926  
 N15 -2.197826 -1.788345 -0.528026  
 C16 -2.338916 -0.464403 -0.406712  
 N17 -1.282966 -0.014622 0.260622  
 H18 -0.697283 -3.215201 0.086809  
 H19 -2.858903 -2.397925 -0.989953

H20 -3.143309 0.145365 -0.781418  
 H21 -1.059197 0.969120 0.458525  
 O22 -2.532870 2.530897 -0.276972  
 H23 -3.077095 3.077408 0.301558  
 H24 -2.248647 3.122479 -0.983498

#### HisH<sup>+</sup>(H<sub>2</sub>O)\_5

O1 0.509607 2.659316 -0.821306  
 C2 0.814065 1.851821 0.210797  
 O3 0.766401 2.184467 1.366111  
 C4 1.253294 0.469739 -0.270026  
 N5 1.464679 -0.402458 0.897477  
 C6 0.233185 -0.167765 -1.250220  
 H7 0.293920 3.538285 -0.470539  
 H8 2.176993 0.632922 -0.839553  
 H9 1.826150 0.146988 1.673485  
 H10 2.142239 -1.131259 0.666470  
 C11 -1.092647 -0.440963 -0.608873  
 H12 0.664108 -1.108450 -1.608019  
 H13 0.095915 0.477338 -2.117859  
 C14 -2.385335 -0.335795 -1.037405  
 N15 -3.184357 -0.745967 0.017330  
 C16 -2.416545 -1.083945 1.060286  
 N17 -1.153001 -0.912748 0.692477  
 H18 -2.799239 -0.012116 -1.976680  
 H19 -4.194795 -0.785382 0.009288  
 H20 -2.767613 -1.425527 2.019671  
 H21 -0.238911 -0.963243 1.212356  
 O22 3.339144 -2.467648 -0.269575  
 H23 3.298249 -3.421206 -0.136272  
 H24 4.254414 -2.287767 -0.512520

#### HisH<sup>+</sup>(H<sub>2</sub>O)\_6

O1 -1.122701 2.310400 -0.683555  
 C2 -1.257908 0.986608 -0.490306  
 O3 -1.589976 0.212067 -1.350607  
 C4 -0.932540 0.614563 0.956355  
 N5 -1.139813 -0.829334 1.156028  
 C6 0.529025 1.002578 1.314319  
 H7 -1.367017 2.516540 -1.599937  
 H8 -1.592058 1.229170 1.580883  
 H9 -2.010529 -1.140632 0.713323  
 H10 -1.227826 -1.025659 2.149840  
 C11 1.540191 0.253763 0.498838  
 H12 0.685269 0.784280 2.376245  
 H13 0.673059 2.075246 1.184355  
 C14 2.747539 0.593855 -0.042129  
 N15 3.221329 -0.535930 -0.688294  
 C16 2.337704 -1.533189 -0.558783  
 N17 1.323608 -1.072397 0.161539

H18 3.299849 1.517527 -0.025860  
 H19 4.099492 -0.605049 -1.185010  
 H20 2.436835 -2.523534 -0.970808  
 H21 0.388044 -1.477149 0.430482  
 O22 -3.661254 -1.568258 -0.198547  
 H23 -4.455516 -2.109045 -0.142157  
 H24 -3.558078 -1.320802 -1.124355

#### HisH<sup>+</sup>(H<sub>2</sub>O)\_7

O1 -2.723506 -1.300818 -0.550699  
 C2 -2.126199 -0.457653 0.289392  
 O3 -2.103287 -0.556403 1.489647  
 C4 -1.434552 0.680315 -0.461987  
 N5 -1.011592 1.677950 0.585208  
 C6 -0.243553 0.195048 -1.325216  
 H7 -3.153652 -2.009757 -0.043958  
 H8 -2.158524 1.173055 -1.113392  
 H9 -0.692778 1.163791 1.415099  
 H10 -0.222144 2.314874 0.263663  
 H11 -1.803872 2.247500 0.887804  
 C12 0.872316 -0.466828 -0.572508  
 H13 -0.658674 -0.494904 -2.061700  
 H14 0.142205 1.056137 -1.876928  
 C15 1.193212 -1.797971 -0.495490  
 N16 2.316636 -1.862181 0.296733  
 C17 2.639206 -0.599120 0.669390  
 N18 1.788073 0.270731 0.163107  
 H19 0.748090 -2.675047 -0.934761  
 H20 2.823014 -2.700506 0.543263  
 H21 3.489216 -0.367513 1.291963  
 O22 1.196766 2.920859 -0.209119  
 H23 1.761738 2.128321 -0.046780  
 H24 1.711194 3.726695 -0.099722

#### HisH<sup>+</sup>(H<sub>2</sub>O)<sub>2</sub>\_1

O1 -2.168864 0.881297 1.001596  
 C2 -2.140804 0.031645 -0.014872  
 O3 -2.439691 0.304084 -1.158251  
 C4 -1.712482 -1.375246 0.414040  
 N5 -1.489893 -2.193304 -0.792163  
 C6 -0.455380 -1.363108 1.318897  
 H7 -2.499420 1.763357 0.675758  
 H8 -2.540458 -1.756378 1.025763  
 H9 -2.104115 -1.862122 -1.533796  
 H10 -1.710369 -3.168322 -0.614922  
 C11 0.764277 -0.833671 0.631136  
 H12 -0.266323 -2.390108 1.649824  
 H13 -0.652910 -0.769102 2.210983  
 C14 1.779839 -0.012408 1.033465  
 N15 2.648559 0.113686 -0.034473

C16 2.187105 -0.596320 -1.064401  
 N17 1.054543 -1.181354 -0.677885  
 H18 1.953352 0.485638 1.971551  
 H19 3.519086 0.668325 -0.045439  
 H20 2.648119 -0.675393 -2.034426  
 H21 0.357876 -1.735689 -1.205733  
 O22 -3.008619 3.077988 -0.240392  
 H23 -3.228336 2.706511 -1.104642  
 H24 -3.653521 3.767679 -0.050071  
 O25 5.011785 1.594933 -0.117291  
 H26 5.102484 2.525351 -0.352453  
 H27 5.889855 1.295288 0.144375

#### HisH<sup>+</sup>(H<sub>2</sub>O)<sub>2</sub>\_2

O1 -1.895132 -2.596379 -0.578155  
 C2 -1.868891 -1.604730 0.330331  
 O3 -1.590189 -1.759834 1.491260  
 C4 -2.199702 -0.249376 -0.299679  
 N5 -2.447583 0.765779 0.734464  
 C6 -1.084211 0.165582 -1.307050  
 H7 -1.701545 -3.434279 -0.127530  
 H8 -3.104093 -0.376347 -0.898927  
 H9 -1.980974 0.477105 1.594636  
 H10 -3.438252 0.783259 0.960578  
 C11 0.294040 0.305849 -0.738044  
 H12 -1.386198 1.111725 -1.760980  
 H13 -1.051854 -0.581020 -2.102153  
 C14 1.349419 -0.565116 -0.722280  
 N15 2.395709 0.066390 -0.082422  
 C16 2.006217 1.288037 0.283516  
 N17 0.743012 1.454291 -0.102210  
 H18 1.441557 -1.562121 -1.117248  
 H19 3.334389 -0.328889 0.085484  
 H20 2.612252 2.014564 0.798307  
 H21 0.153969 2.303570 0.042712  
 O22 -1.238540 3.223674 0.141579  
 H23 -1.547062 4.089045 0.425574  
 H24 -1.886987 2.531245 0.413292  
 O25 4.948047 -0.955472 0.394156  
 H26 5.710631 -0.901236 -0.193044  
 H27 5.231488 -1.469230 1.158992

#### HisH<sup>+</sup>(H<sub>2</sub>O)<sub>2</sub>\_3

O1 -2.318868 -0.199320 0.937867  
 C2 -1.584191 -0.787530 0.002958  
 O3 -1.808495 -0.738849 -1.187743  
 C4 -0.374938 -1.525612 0.590199  
 N5 0.356702 -2.250907 -0.462120  
 C6 0.521515 -0.542123 1.401551  
 H7 -3.095563 0.250766 0.503892

H8 -0.760281 -2.238805 1.323387  
 H9 0.019259 -1.920728 -1.367336  
 H10 0.114274 -3.236731 -0.425898  
 C11 0.999748 0.666602 0.657677  
 H12 1.380824 -1.101069 1.777705  
 H13 -0.051275 -0.200721 2.264491  
 C14 0.496111 1.937237 0.612398  
 N15 1.321763 2.667140 -0.221836  
 C16 2.302665 1.879628 -0.676551  
 N17 2.124526 0.671612 -0.155658  
 H18 -0.360882 2.371409 1.097537  
 H19 1.213208 3.645586 -0.452258  
 H20 3.094990 2.177268 -1.342864  
 H21 2.711790 -0.180072 -0.333762  
 O22 3.100360 -1.769093 -0.397681  
 H23 3.764005 -2.350882 -0.779579  
 H24 2.200785 -2.174558 -0.486430  
 O25 -4.201845 0.953539 -0.547423  
 H26 -5.156661 1.049835 -0.461076  
 H27 -4.030095 0.554353 -1.410061

#### HisH<sup>+</sup>(H<sub>2</sub>O)<sub>2</sub>\_4

O1 -2.248992 -2.142961 0.845849  
 C2 -2.336937 -0.802143 0.774665  
 O3 -2.447448 -0.082709 1.733438  
 C4 -2.304375 -0.313922 -0.671575  
 N5 -2.282368 1.152721 -0.679014  
 C6 -1.092398 -0.876503 -1.455199  
 H7 -2.328541 -2.404888 1.776849  
 H8 -3.206420 -0.729913 -1.140540  
 H9 -2.774774 1.510798 0.135154  
 H10 -2.740324 1.516693 -1.508076  
 C11 0.233338 -0.493080 -0.875932  
 H12 -1.162712 -0.503546 -2.482558  
 H13 -1.154523 -1.963991 -1.505547  
 C14 1.371520 -1.220178 -0.664522  
 N15 2.311656 -0.362897 -0.123812  
 C16 1.775190 0.851042 0.002788  
 N17 0.525172 0.793174 -0.451392  
 H18 1.586683 -2.257670 -0.853216  
 H19 3.275710 -0.612684 0.142639  
 H20 2.245883 1.730818 0.406353  
 H21 -0.163863 1.551897 -0.424558  
 O22 4.937787 -1.012961 0.596334  
 H23 5.711016 -0.996856 0.021042  
 H24 5.243497 -1.338768 1.450398  
 O25 0.410690 3.537591 0.437234  
 H26 -0.003643 3.801135 1.266928  
 H27 0.496470 4.353012 -0.069536

HisH<sup>+</sup>(H<sub>2</sub>O)<sub>2</sub>\_5

O1 1.328913 2.626200 -0.809326  
 C2 1.570751 1.788702 0.216895  
 O3 1.561317 2.121991 1.373240  
 C4 1.886028 0.377340 -0.273227  
 N5 2.031022 -0.516839 0.885728  
 C6 0.808275 -0.162310 -1.249909  
 H7 1.190055 3.516616 -0.449419  
 H8 2.815881 0.466517 -0.850090  
 H9 2.430388 -0.001760 1.666406  
 H10 2.654657 -1.290308 0.651123  
 C11 -0.537500 -0.311878 -0.610264  
 H12 1.152250 -1.137411 -1.609878  
 H13 0.729182 0.493400 -2.116967  
 C14 -1.812696 -0.065603 -1.036861  
 N15 -2.660472 -0.410956 -0.000555  
 C16 -1.937879 -0.847521 1.032523  
 N17 -0.655419 -0.803129 0.678838  
 H18 -2.182589 0.318592 -1.971654  
 H19 -3.690020 -0.344415 -0.011675  
 H20 -2.327763 -1.171509 1.982672  
 H21 0.224966 -0.962589 1.213422  
 O22 3.784954 -2.717480 -0.255648  
 H23 3.672009 -3.665626 -0.126400  
 H24 4.715072 -2.603757 -0.480873  
 O25 -5.450055 -0.250533 0.024933  
 H26 -6.070818 -0.921003 -0.282140  
 H27 -5.982085 0.505913 0.296865

HisH<sup>+</sup>(H<sub>2</sub>O)<sub>2</sub>\_6

O1 1.697527 2.124837 1.072527  
 C2 1.807836 0.831386 0.718082  
 O3 1.960397 -0.066738 1.506294  
 C4 1.717704 0.675131 -0.799195  
 N5 1.868143 -0.741398 -1.164844  
 C6 0.370420 1.228564 -1.337667  
 H7 1.793420 2.188741 2.035973  
 H8 2.513715 1.308875 -1.210402  
 H9 2.635845 -1.174944 -0.643495  
 H10 2.106169 -0.812293 -2.150718  
 C11 -0.818675 0.487948 -0.804084  
 H12 0.389931 1.148993 -2.430082  
 H13 0.279698 2.287832 -1.096836  
 C14 -2.072282 0.879398 -0.424662  
 N15 -2.747857 -0.258303 -0.024079  
 C16 -1.940807 -1.314148 -0.143325  
 N17 -0.775370 -0.883793 -0.619794  
 H18 -2.533189 1.851828 -0.406297  
 H19 -3.722228 -0.297964 0.313744  
 H20 -2.191464 -2.331035 0.107495

H21 0.136897 -1.363993 -0.780952  
 O22 4.099712 -1.803943 0.483222  
 H23 4.841808 -2.414644 0.533168  
 H24 3.799391 -1.654754 1.387065  
 O25 -5.381433 -0.429342 0.888313  
 H26 -5.687773 -0.344379 1.798335  
 H27 -6.171431 -0.535989 0.346281

HisH<sup>+</sup>(H<sub>2</sub>O)<sub>2</sub>\_7

O1 -2.048689 -0.568404 1.019490  
 C2 -1.316411 -0.930634 -0.025225  
 O3 -1.730280 -1.035019 -1.160449  
 C4 0.132627 -1.242875 0.359309  
 N5 0.934664 -1.409909 -0.866021  
 C6 0.750565 -0.158981 1.279610  
 H7 -2.988260 -0.424971 0.720233  
 H8 0.086227 -2.167295 0.949300  
 H9 0.350768 -1.820248 -1.591437  
 H10 1.724848 -2.031349 -0.686424  
 C11 0.874099 1.169235 0.599409  
 H12 1.743979 -0.504484 1.583961  
 H13 0.149764 -0.054127 2.182439  
 C14 0.690712 2.460100 1.006439  
 N15 0.960460 3.260736 -0.091510  
 C16 1.289522 2.494198 -1.138773  
 N17 1.249765 1.231618 -0.732496  
 H18 0.394139 2.871306 1.955674  
 H19 0.915723 4.270612 -0.108251  
 H20 1.535305 2.846045 -2.126626  
 H21 1.333365 0.303173 -1.230715  
 O22 -4.403910 -0.210008 -0.164015  
 H23 -4.199605 -0.558277 -1.041626  
 H24 -5.318631 -0.438831 0.032487  
 O25 3.235491 -3.129122 0.109838  
 H26 3.145144 -4.047179 0.388829  
 H27 4.165422 -3.027332 -0.121175

HisH<sup>+</sup>(H<sub>2</sub>O)<sub>2</sub>\_8

O1 -3.203131 -0.576759 -0.869995  
 C2 -2.259249 -0.292239 0.037258  
 O3 -2.074114 -0.955859 1.031886  
 C4 -1.444241 0.940635 -0.371150  
 N5 -0.830889 1.636476 0.760095  
 C6 -0.391263 0.540412 -1.451649  
 H7 -3.694049 -1.363937 -0.581868  
 H8 -2.132649 1.626633 -0.868709  
 H9 -0.394024 0.975499 1.406868  
 H10 -1.541793 2.133987 1.288841  
 C11 0.739296 -0.309226 -0.960442  
 H12 0.014762 1.464158 -1.868612

H13 -0.903424 0.018306 -2.261979  
 C14 0.920327 -1.663696 -0.964225  
 N15 2.141344 -1.906623 -0.366545  
 C16 2.696099 -0.747062 -0.002717  
 N17 1.871806 0.226364 -0.364346  
 H18 0.299927 -2.458936 -1.339502  
 H19 2.550823 -2.816743 -0.207337  
 H20 3.644087 -0.628490 0.494020  
 H21 2.005181 1.248472 -0.195320  
 O22 1.566903 2.856909 -0.026229  
 H23 1.935128 3.700761 0.252128  
 H24 0.659235 2.751541 0.342874  
 O25 0.414364 -0.730945 2.375485  
 H26 0.563354 -0.840025 3.320539  
 H27 -0.480373 -1.064447 2.202006

#### HisH<sup>+</sup>(H<sub>2</sub>O)<sub>2</sub>\_9

O1 1.444452 -1.489447 0.824079  
 C2 1.308042 -0.237212 0.411551  
 O3 1.806626 0.212776 -0.597871  
 C4 0.455348 0.582904 1.387276  
 N5 0.176877 1.918451 0.831998  
 C6 -0.874569 -0.141231 1.730821  
 H7 2.036301 -1.994794 0.203602  
 H8 1.042119 0.628499 2.313823  
 H9 0.976808 2.303567 0.321095  
 H10 -0.042041 2.569434 1.580921  
 C11 -1.772626 -0.286552 0.539536  
 H12 -1.390346 0.442022 2.501423  
 H13 -0.664955 -1.122550 2.154953  
 C14 -2.611373 -1.274208 0.107317  
 N15 -3.179773 -0.819613 -1.071402  
 C16 -2.704554 0.398430 -1.360584  
 N17 -1.861449 0.733937 -0.393131  
 H18 -2.847431 -2.238977 0.521609  
 H19 -3.851853 -1.324203 -1.633427  
 H20 -2.961125 0.988970 -2.224105  
 H21 -1.200867 1.547055 -0.252925  
 O22 2.998350 -2.851246 -0.881674  
 H23 3.452446 -2.330415 -1.553632  
 H24 3.565693 -3.603244 -0.679219  
 O25 2.211231 3.032319 -1.003558  
 H26 2.522096 2.162443 -1.284084  
 H27 2.926686 3.654759 -1.165610

#### HisH<sup>+</sup>(H<sub>2</sub>O)<sub>2</sub>\_10

O1 -0.960100 -2.679676 -0.472421  
 C2 -1.037713 -1.614682 0.349022  
 O3 -0.986461 -1.690066 1.549575  
 C4 -1.165691 -0.304231 -0.429452

N5 -1.450591 0.817603 0.473197  
 C6 0.090003 -0.081903 -1.328917  
 H7 -0.914405 -3.482823 0.070970  
 H8 -2.004977 -0.421432 -1.119698  
 H9 -1.235634 0.532043 1.428178  
 H10 -2.455253 1.001313 0.447664  
 C11 1.406771 -0.045470 -0.616894  
 H12 -0.053727 0.855736 -1.870008  
 H13 0.126869 -0.882783 -2.068722  
 C14 2.360279 -1.013269 -0.460036  
 N15 3.386832 -0.451495 0.275720  
 C16 3.082492 0.819094 0.562572  
 N17 1.894387 1.080640 0.032149  
 H18 2.396968 -2.029662 -0.811953  
 H19 4.240692 -0.917247 0.551718  
 H20 3.697000 1.504862 1.121623  
 H21 1.367216 1.991185 0.089332  
 O22 -4.396456 0.940563 -0.087682  
 H23 -4.870087 1.572631 -0.639467  
 H24 -5.075105 0.500233 0.435959  
 O25 0.125476 3.027816 -0.000198  
 H26 -0.616502 2.395269 0.203460  
 H27 -0.093965 3.907111 0.321543

#### HisH<sup>+</sup>(H<sub>2</sub>O)<sub>2</sub>\_11

O1 0.582960 -2.510792 -0.155749  
 C2 1.094289 -1.267822 -0.274152  
 O3 1.553876 -0.831520 -1.296407  
 C4 1.011745 -0.524561 1.054720  
 N5 1.640136 0.798925 0.942683  
 C6 -0.454441 -0.447341 1.584221  
 H7 0.700658 -2.969179 -1.002973  
 H8 1.549185 -1.159253 1.771160  
 H9 2.508640 0.730998 0.400483  
 H10 1.915236 1.101207 1.874470  
 C11 -1.541367 -0.175100 0.587167  
 H12 -0.480305 0.310339 2.372876  
 H13 -0.695830 -1.399581 2.058113  
 C14 -2.551436 -1.002580 0.180913  
 N15 -3.314405 -0.293899 -0.726948  
 C16 -2.792865 0.928576 -0.879623  
 N17 -1.728696 1.021231 -0.092615  
 H18 -2.784836 -2.015247 0.460754  
 H19 -4.138884 -0.634950 -1.202363  
 H20 -3.168385 1.699437 -1.531930  
 H21 -1.088959 1.867278 -0.050699  
 O22 4.109761 0.460628 -0.663638  
 H23 4.995163 0.802443 -0.823581  
 H24 3.781149 0.133760 -1.509114  
 O25 0.129948 2.857319 -0.095419

H26 0.821172 2.231432 0.257792  
H27 0.298840 3.745409 0.233398

HisH<sup>+</sup>(H<sub>2</sub>O)<sub>2</sub>\_12

O1 -0.797465 -1.870610 -1.960790  
C2 -0.997401 -1.340072 -0.740419  
O3 -1.220114 -1.998260 0.244419  
C4 -0.905818 0.183831 -0.788278  
N5 -1.163324 0.751509 0.544674  
C6 0.486801 0.648689 -1.299556  
H7 -0.894708 -2.834001 -1.897298  
H8 -1.644062 0.504820 -1.533345  
H9 -1.982514 0.317501 0.978550  
H10 -1.349797 1.749873 0.439120  
C11 1.591541 0.244914 -0.369868  
H12 0.453555 1.740138 -1.378512  
H13 0.675171 0.250334 -2.296298  
C14 2.878540 -0.175035 -0.553276  
N15 3.399863 -0.401877 0.710248  
C16 2.466492 -0.139639 1.635318  
N17 1.374932 0.259574 0.998070  
H18 3.457288 -0.330936 -1.447142  
H19 4.338925 -0.717607 0.911390  
H20 2.589149 -0.242287 2.700505  
H21 0.366653 0.478707 1.290137  
O22 -3.481082 -0.765298 1.632918  
H23 -4.256457 -0.779298 2.202651  
H24 -3.130253 -1.663404 1.615968  
O25 -1.265136 3.668972 -0.393659  
H26 -1.990512 4.013777 -0.926875  
H27 -0.923282 4.433378 0.083582

**[His-H]<sup>-</sup>****[His<sup>π</sup>-H<sub>ca</sub>]<sup>-</sup>\_1**

O1 -1.066728 -1.743839 0.105011  
 C2 -1.906475 -0.799952 0.009199  
 O3 -3.141884 -0.880762 0.139818  
 C4 -1.326722 0.627894 -0.340614  
 N5 -2.402050 1.633248 -0.284727  
 C6 -0.154897 1.066215 0.585352  
 H7 -0.923033 0.543485 -1.359654  
 H8 -3.265957 1.102097 -0.161629  
 H9 -2.468468 2.136904 -1.162179  
 C10 1.196788 0.511710 0.249287  
 H11 -0.094598 2.156627 0.537884  
 H12 -0.424086 0.819731 1.620546  
 C13 2.443824 1.087047 0.111212  
 N14 3.389579 0.132669 -0.202238  
 C15 2.712254 -1.002078 -0.256352  
 N16 1.392908 -0.824886 0.012625  
 H17 2.709589 2.128670 0.222314  
 H18 0.550482 -1.453632 0.004680  
 H19 3.133279 -1.969302 -0.488719

**[His<sup>π</sup>-H<sub>ca</sub>]<sup>-</sup>\_2**

O1 -3.143435 -0.904202 0.062454  
 C2 -1.903895 -0.807511 0.003667  
 O3 -1.059633 -1.741260 0.165298  
 C4 -1.333876 0.620432 -0.365450  
 N5 -2.384643 1.658004 -0.355587  
 C6 -0.154842 1.098842 0.516879  
 H7 0.536078 -1.448425 0.066734  
 H8 -0.964106 0.534548 -1.395728  
 H9 -3.257168 1.148731 -0.505222  
 H10 -2.470888 2.009582 0.596793  
 C11 1.194157 0.523208 0.209074  
 H12 -0.410947 0.907998 1.569161  
 H13 -0.079731 2.185288 0.402454  
 C14 2.443024 1.088703 0.052050  
 N15 3.387648 0.116668 -0.202256  
 C16 2.706857 -1.017785 -0.201350  
 N17 1.386377 -0.824242 0.047450  
 H18 2.710066 2.134477 0.106444  
 H19 3.127016 -1.996843 -0.379129

**[His<sup>π</sup>-H<sub>ca</sub>]<sup>-</sup>\_3**

O1 2.860493 -0.724167 -0.790383  
 C2 1.926547 -0.646193 0.030780  
 O3 1.347897 -1.595691 0.641369  
 C4 1.459512 0.825906 0.353264  
 N5 1.453703 1.696232 -0.839658

C6 0.128018 0.955292 1.120763  
 H7 -0.374981 -1.547463 0.290942  
 H8 2.237923 1.217719 1.022869  
 H9 2.232739 1.374169 -1.413049  
 H10 0.615883 1.485965 -1.380152  
 C11 -1.084816 0.407125 0.430192  
 H12 -0.046874 2.016405 1.326671  
 H13 0.247331 0.447514 2.083111  
 C14 -2.271521 0.962605 0.000103  
 N15 -3.091232 0.000315 -0.554029  
 C16 -2.400477 -1.122152 -0.460955  
 N17 -1.193154 -0.930504 0.131339  
 H18 -2.577895 1.996778 0.062160  
 H19 -2.730041 -2.090024 -0.808890

**[His<sup>π</sup>-H<sub>ca</sub>]<sup>-</sup>\_4**

O1 3.117815 0.513957 -0.831975  
 C2 2.059348 0.510003 -0.180450  
 O3 1.434176 1.518274 0.284414  
 C4 1.430558 -0.901945 0.113477  
 N5 1.121147 -1.154650 1.534663  
 C6 0.183030 -1.192078 -0.757070  
 H7 2.192514 -1.626896 -0.183532  
 H8 0.477279 -0.436511 1.858036  
 H9 1.970871 -1.012459 2.074717  
 C10 -1.084148 -0.475884 -0.381509  
 H11 0.448941 -0.959744 -1.796510  
 H12 -0.024520 -2.266310 -0.714096  
 C13 -2.404301 -0.875175 -0.364641  
 N14 -3.225431 0.162421 0.023148  
 C15 -2.402492 1.172999 0.244314  
 N16 -1.105806 0.842562 0.007228  
 H17 -2.803681 -1.849753 -0.606296  
 H18 -0.201545 1.356982 0.169677  
 H19 -2.697132 2.156982 0.578503

**[His<sup>π</sup>-H<sub>ca</sub>]<sup>-</sup>\_5**

O1 -2.877669 -0.502016 -1.096014  
 C2 -2.031879 -0.485742 -0.189535  
 O3 -1.536928 -1.474909 0.441523  
 C4 -1.450905 0.923400 0.195666  
 N5 -1.184785 1.010688 1.640173  
 C6 -0.213370 1.246578 -0.690368  
 H7 -2.222571 1.648510 -0.078214  
 H8 -0.317269 1.506990 1.822429  
 H9 -1.058865 0.057887 1.976241  
 C10 1.045413 0.491546 -0.367920  
 H11 -0.507955 1.075223 -1.733338  
 H12 0.016413 2.316295 -0.607049  
 C13 2.373460 0.864903 -0.372976



N14 3.185154 -0.195797 -0.029549  
 C15 2.349912 -1.195576 0.188330  
 N16 1.054301 -0.836833 -0.010775  
 H17 2.785623 1.835625 -0.609451  
 H18 0.170252 -1.350281 0.192544  
 H19 2.632668 -2.191907 0.494639

[His<sup>π</sup>-H<sub>ca</sub>]<sub>6</sub>

O1 -2.813657 -1.511368 -0.198902  
 C2 -2.634786 -0.275777 -0.144061  
 O3 -3.476713 0.653095 -0.065621  
 C4 -1.134070 0.205749 -0.242845  
 N5 -0.945195 1.607508 0.223219  
 C6 -0.150892 -0.732990 0.470655  
 H7 -0.891724 0.195558 -1.314194  
 H8 -1.085212 1.600937 1.234331  
 H9 -1.776491 2.096816 -0.112573  
 C10 1.293252 -0.436301 0.187670  
 H11 -0.339935 -0.672616 1.553533  
 H12 -0.393469 -1.755215 0.180024  
 C13 2.426177 -1.211184 0.065605  
 N14 3.535716 -0.429506 -0.191406  
 C15 3.079472 0.806309 -0.229014  
 N16 1.737256 0.854917 -0.000514  
 H17 2.501586 -2.285587 0.142969  
 H18 1.068200 1.631125 -0.015557  
 H19 3.670644 1.689891 -0.419504

[His<sup>π</sup>-H<sub>ca</sub>]<sub>7</sub>

O1 2.152297 -1.675657 -0.402365  
 C2 2.049621 -0.435373 -0.473923  
 O3 2.418118 0.352092 -1.381791  
 C4 1.419682 0.259790 0.800955  
 N5 1.188928 1.702270 0.529878  
 C6 0.158254 -0.463689 1.323344  
 H7 2.184834 0.137013 1.580148  
 H8 1.732283 1.867702 -0.325862  
 H9 1.580491 2.277179 1.268869  
 C10 -1.082016 -0.300578 0.497042  
 H11 0.401325 -1.525940 1.388619  
 H12 -0.051660 -0.110062 2.344529  
 C13 -2.124565 -1.140895 0.174990  
 N14 -3.078047 -0.479559 -0.573559  
 C15 -2.613822 0.746772 -0.708507  
 N16 -1.422527 0.907504 -0.068365  
 H17 -2.231657 -2.185112 0.427593  
 H18 -0.748143 1.676362 -0.051260  
 H19 -3.092184 1.543717 -1.258481

[His<sup>π</sup>-H<sub>ca</sub>]<sub>8</sub>

O1 -2.617191 -1.626073 -0.266071  
 C2 -2.626192 -0.377438 -0.155854  
 O3 -3.601652 0.401934 -0.035873  
 C4 -1.210429 0.328384 -0.235602  
 N5 -1.223029 1.733484 0.219228  
 C6 -0.143689 -0.492688 0.493995  
 H7 -0.952085 0.331770 -1.303540  
 H8 -1.185010 1.728883 1.237995  
 H9 -2.173782 2.049838 0.017703  
 C10 1.280662 -0.147300 0.179673  
 H11 -0.315354 -0.403117 1.578079  
 H12 -0.342118 -1.538621 0.243784  
 C13 1.943868 1.012656 -0.148053  
 N14 3.296032 0.782218 -0.330095  
 C15 3.462669 -0.502184 -0.116881  
 N16 2.277379 -1.109799 0.198006  
 H17 1.502329 1.988854 -0.264928  
 H18 2.127010 -2.091305 0.369693  
 H19 4.395751 -1.043089 -0.176870

[His<sup>τ</sup>-H<sub>ca</sub>]<sub>1</sub>

O1 1.434618 1.874937 -0.416528  
 C2 1.845551 0.819545 0.132181  
 O3 2.573418 0.698349 1.146684  
 C4 1.400650 -0.538950 -0.529226  
 N5 2.508172 -1.525644 -0.538024  
 C6 0.209198 -1.185672 0.204671  
 H7 1.111081 -0.341579 -1.566175  
 H8 2.962811 -1.408950 0.369940  
 C9 -1.113438 -0.483574 0.087530  
 H10 0.088302 -2.203578 -0.179420  
 H11 0.477221 -1.286240 1.264924  
 C12 -1.375246 0.826074 -0.231427  
 N13 -2.751917 0.950477 -0.189171  
 C14 -3.261638 -0.271143 0.150521  
 N15 -2.306630 -1.155733 0.322460  
 H16 -0.689810 1.631197 -0.457567  
 H17 -3.273282 1.792175 -0.370203  
 H18 -4.322212 -0.452184 0.249990  
 H19 3.203755 -1.198511 -1.205103

[His<sup>τ</sup>-H<sub>ca</sub>]<sub>2</sub>

O1 1.800083 -1.461017 0.894160  
 C2 1.931160 -0.615038 -0.026134  
 O3 2.394872 -0.781067 -1.179967  
 C4 1.484913 0.857075 0.328015  
 N5 1.394941 1.739612 -0.851710  
 C6 0.192000 0.898028 1.166914  
 H7 2.284287 1.244491 0.976400

H8 1.933686 1.255417 -1.572530  
 H9 0.434834 1.732724 -1.189437  
 C10 -1.005157 0.280524 0.500653  
 H11 0.398010 0.368800 2.099753  
 H12 -0.054912 1.937426 1.407330  
 C13 -1.181012 -1.036702 0.149025  
 N14 -2.426389 -1.102344 -0.443685  
 C15 -2.951100 0.159221 -0.429739  
 N16 -2.124801 1.013090 0.132784  
 H17 -0.514439 -1.877570 0.251568  
 H18 -2.847101 -1.924560 -0.844276  
 H19 -3.925086 0.388781 -0.836488

[His<sup>τ</sup>-H<sub>ca</sub>]<sup>-</sup>\_3

O1 3.012825 -1.407974 -0.111717  
 C2 2.653227 -0.214783 -0.013477  
 O3 3.282546 0.833245 -0.307008  
 C4 1.177010 -0.000396 0.503984  
 N5 0.996734 1.377463 0.973806  
 C6 0.226079 -0.406884 -0.657831  
 H7 1.008875 -0.702083 1.326898  
 H8 1.735843 1.916747 0.518699  
 H9 0.090741 1.754088 0.711183  
 C10 -1.230055 -0.235434 -0.362696  
 H11 0.484350 0.196202 -1.536213  
 H12 0.432974 -1.452771 -0.897003  
 C13 -2.052259 0.802969 -0.736000  
 N14 -3.293031 0.530736 -0.181554  
 C15 -3.169024 -0.648668 0.496947  
 N16 -1.954687 -1.133145 0.408450  
 H17 -1.872339 1.679804 -1.335715  
 H18 -4.120599 1.098850 -0.255558  
 H19 -3.995785 -1.099200 1.027041

[His<sup>τ</sup>-H<sub>ca</sub>]<sup>-</sup>\_4

O1 -2.854340 -1.507705 0.026283  
 C2 -2.641342 -0.274413 -0.030957  
 O3 -3.425282 0.678594 0.197521  
 C4 -1.165823 0.121767 -0.431050  
 N5 -1.050482 1.555696 -0.726563  
 C6 -0.210845 -0.364194 0.688108  
 H7 -0.928107 -0.461981 -1.330138  
 H8 -1.918817 1.967408 -0.379047  
 H9 -0.270150 1.974338 -0.230162  
 C10 1.243203 -0.238844 0.354058  
 H11 -0.415212 0.206467 1.600425  
 H12 -0.460144 -1.410349 0.881534  
 C13 2.041857 -1.145997 -0.301918  
 N14 3.283445 -0.545827 -0.425048  
 C15 3.189433 0.684602 0.158652

N16 1.985741 0.899040 0.636568  
 H17 1.836601 -2.128403 -0.693251  
 H18 4.098329 -0.942381 -0.863186  
 H19 4.024653 1.367901 0.207339

[His<sup>τ</sup>-H<sub>ca</sub>]<sup>-</sup>\_5

O1 3.012825 -1.407974 -0.111717  
 C2 2.653227 -0.214783 -0.013477  
 O3 3.282546 0.833245 -0.307008  
 C4 1.177010 -0.000396 0.503984  
 N5 0.996734 1.377463 0.973806  
 C6 0.226079 -0.406884 -0.657831  
 H7 1.008875 -0.702083 1.326898  
 H8 1.735843 1.916747 0.518699  
 H9 0.090741 1.754088 0.711183  
 C10 -1.230055 -0.235434 -0.362696  
 H11 0.484350 0.196202 -1.536213  
 H12 0.432974 -1.452771 -0.897003  
 C13 -2.052259 0.802969 -0.736000  
 N14 -3.293031 0.530736 -0.181554  
 C15 -3.169024 -0.648668 0.496947  
 N16 -1.954687 -1.133145 0.408450  
 H17 -1.872339 1.679804 -1.335715  
 H18 -4.120599 1.098850 -0.255558  
 H19 -3.995785 -1.099200 1.027041

[His-H<sub>im</sub>]<sup>-</sup>\_1

O1 3.281678 0.438938 -0.439016  
 C2 2.096555 0.429795 -0.146284  
 O3 1.390905 1.531105 -0.006719  
 C4 1.371000 -0.920114 0.085694  
 N5 1.067271 -1.059812 1.521735  
 C6 0.149873 -1.141346 -0.859915  
 H7 2.126882 -1.669755 -0.156728  
 H8 0.326036 -0.406304 1.764446  
 C9 -1.101557 -0.427420 -0.437295  
 H10 0.452141 -0.853482 -1.877937  
 H11 -0.055684 -2.218293 -0.897300  
 C12 -2.422228 -0.838442 -0.369638  
 N13 -3.206135 0.187864 0.101429  
 C14 -2.334398 1.176780 0.311996  
 N15 -1.050472 0.870764 0.007912  
 H16 -2.844038 -1.800260 -0.633717  
 H17 -2.618602 2.147662 0.698170  
 H18 0.680182 -1.985821 1.685968  
 H19 0.322307 1.358691 0.058095

[His-H<sub>im</sub>]<sup>-</sup>\_2

O1 3.073052 -1.366968 0.269632  
 C2 2.545587 -0.293625 0.090116

O3 3.181329 0.736457 -0.494422  
 C4 1.091262 0.035736 0.458517  
 N5 0.909872 1.501289 0.410206  
 C6 0.126859 -0.655641 -0.544972  
 H7 0.900981 -0.382581 1.452315  
 H8 -0.058219 1.697761 0.107908  
 C9 -1.316883 -0.364632 -0.266903  
 H10 0.315127 -1.731357 -0.505076  
 H11 0.401651 -0.315620 -1.553778  
 C12 -2.356334 -1.218374 0.081561  
 N13 -3.508271 -0.493676 0.243426  
 C14 -3.112700 0.765130 -0.007713  
 N15 -1.809045 0.918733 -0.325708  
 H16 -2.334478 -2.294109 0.212035  
 H17 -3.795552 1.606869 0.035671  
 H18 1.018254 1.901644 1.336921  
 H19 2.502550 1.465504 -0.446769

[His-H<sub>im</sub>]<sub>3</sub>

O1 2.435711 -1.567851 -0.024025  
 C2 2.057314 -0.449099 -0.282371  
 O3 2.263000 0.132658 -1.470171  
 C4 1.359692 0.477051 0.737618  
 N5 1.057333 1.768242 0.084812  
 C6 0.124286 -0.193367 1.395417  
 H7 2.118800 0.633149 1.514478  
 H8 0.033240 1.834755 -0.051575  
 H9 1.353284 2.547184 0.660868  
 C10 -1.108567 -0.199361 0.540691  
 H11 -0.068299 0.351667 2.330899  
 H12 0.399717 -1.215661 1.667992  
 C13 -1.881363 -1.258662 0.082476  
 N14 -2.937829 -0.775250 -0.643934  
 C15 -2.754534 0.553967 -0.599493  
 N16 -1.678918 0.975790 0.100027  
 H17 -1.728817 -2.320554 0.233684  
 H18 -3.427044 1.249167 -1.090691  
 H19 1.864356 1.037184 -1.344452

[His-H<sub>im</sub>]<sub>4</sub>

O1 2.880360 1.494414 -0.136397  
 C2 2.526594 0.340750 -0.150327  
 O3 3.413690 -0.677172 -0.171868  
 C4 1.071080 -0.144758 -0.204852  
 N5 1.033009 -1.564525 0.212616  
 C6 0.063485 0.750060 0.530961  
 H7 0.809739 -0.130350 -1.271143  
 H8 1.036531 -1.585527 1.232773  
 C9 -1.357905 0.373300 0.207354  
 H10 0.246804 1.794188 0.263560

H11 0.274219 0.666398 1.611182  
 C12 -2.459409 1.191867 -0.009120  
 N13 -3.562352 0.420097 -0.270488  
 C14 -3.077765 -0.829697 -0.204712  
 N15 -1.760982 -0.936907 0.079745  
 H16 -2.510692 2.274520 0.005060  
 H17 -3.699278 -1.702649 -0.373795  
 H18 0.085199 -1.888951 -0.023070  
 H19 2.840870 -1.485353 -0.147386

[His-H<sub>im</sub>]<sub>5</sub>

O1 3.115459 -0.901394 -0.293508  
 C2 1.939981 -0.634527 -0.146326  
 O3 0.997094 -1.476611 -0.594670  
 C4 1.493795 0.695534 0.495292  
 N5 1.360406 1.759225 -0.513015  
 C6 0.195717 0.613642 1.329095  
 H7 0.097405 -1.146563 -0.351782  
 H8 2.322246 0.959780 1.161368  
 H9 2.080643 1.677388 -1.223224  
 H10 0.436504 1.695266 -0.949024  
 C11 -1.039735 0.219735 0.563642  
 H12 0.065269 1.605409 1.780658  
 H13 0.348658 -0.094434 2.151782  
 C14 -1.923157 -0.839021 0.785366  
 N15 -2.930707 -0.796408 -0.137443  
 C16 -2.614202 0.280617 -0.878909  
 N17 -1.496200 0.939717 -0.518663  
 H18 -1.882765 -1.602976 1.553574  
 H19 -3.217280 0.596552 -1.723041

[His-H<sub>im</sub>]<sub>6</sub>

O1 -2.866869 1.219591 -0.327500  
 C2 -1.741837 0.853659 -0.057267  
 O3 -0.720040 1.712700 -0.073554  
 C4 -1.425885 -0.591313 0.385914  
 N5 -2.595033 -1.469190 0.279919  
 C6 -0.221463 -1.213660 -0.354998  
 H7 0.130593 1.229735 0.094828  
 H8 -1.159188 -0.514381 1.448492  
 H9 -3.431857 -0.910216 0.426750  
 H10 -2.662852 -1.807005 -0.676984  
 C11 1.104963 -0.545396 -0.111804  
 H12 -0.415363 -1.198454 -1.434591  
 H13 -0.196505 -2.269628 -0.055542  
 C14 1.673476 -0.065087 1.074322  
 N15 2.933160 0.403847 0.815159  
 C16 3.068418 0.181425 -0.505052  
 N17 2.012360 -0.378775 -1.125743  
 H18 1.261083 -0.050619 2.077032

H19 3.969922 0.453304 -1.043598

[His-H<sub>im</sub>]<sub>7</sub>

O1 -2.889023 -1.328787 -0.535869  
 C2 -2.501718 -0.110014 -0.055789  
 O3 -3.252259 0.555598 0.622012  
 C4 -1.073709 0.224083 -0.405597  
 N5 -0.914424 1.673655 -0.508388  
 C6 -0.132522 -0.453174 0.652470  
 H7 -3.780732 -1.479474 -0.189655  
 H8 -0.847851 -0.231750 -1.373503  
 H9 -1.358531 2.103623 0.299486  
 H10 0.090213 1.863069 -0.426589  
 C11 1.317537 -0.286562 0.317372  
 H12 -0.368102 -1.521984 0.711833  
 H13 -0.373343 -0.005361 1.627473  
 C14 2.276257 -1.259300 0.051176  
 N15 3.474420 -0.656617 -0.225951  
 C16 3.182432 0.652049 -0.123277  
 N17 1.906863 0.949857 0.202834  
 H18 2.164953 -2.337986 0.053459  
 H19 3.925979 1.424609 -0.289252

[His-H<sub>im</sub>]<sub>8</sub>

O1 2.959069 -1.352747 -0.003247  
 C2 2.500971 -0.068418 0.017076  
 O3 3.201165 0.847503 -0.356758  
 C4 1.067178 0.028489 0.461469  
 N5 0.843351 1.328633 1.091324  
 C6 0.139042 -0.264991 -0.775019  
 H7 3.849226 -1.312178 -0.382326  
 H8 0.869489 -0.759680 1.191004  
 H9 1.205138 2.057288 0.480656  
 H10 -0.165553 1.464090 1.146887  
 C11 -1.308543 -0.178796 -0.412789  
 H12 0.386582 -1.263729 -1.154835  
 H13 0.375710 0.464516 -1.559577  
 C14 -2.243901 0.805652 -0.731629  
 N15 -3.446853 0.492856 -0.159281  
 C16 -3.176552 -0.659245 0.485917  
 N17 -1.914190 -1.119377 0.379222  
 H18 -2.115226 1.688959 -1.348097  
 H19 -3.932571 -1.188239 1.057330

[His-H<sub>im</sub>]<sub>9</sub>

O1 2.065048 -1.604507 0.257852  
 C2 1.870659 -0.404130 -0.358432  
 O3 2.123112 -0.257189 -1.531185  
 C4 1.416028 0.682546 0.612709  
 N5 1.195709 1.969682 -0.033588

C6 0.162450 0.249890 1.420815  
 H7 2.324323 -2.223875 -0.439359  
 H8 2.253730 0.766075 1.325746  
 H9 1.746455 2.021541 -0.885346  
 H10 0.209519 2.011837 -0.313497  
 C11 -1.058615 0.009675 0.584595  
 H12 -0.014199 1.055797 2.145173  
 H13 0.406371 -0.651615 1.988495  
 C14 -1.780882 -1.162414 0.382282  
 N15 -2.829255 -0.913536 -0.463391  
 C16 -2.688665 0.395827 -0.737634  
 N17 -1.650032 1.016539 -0.140530  
 H18 -1.602768 -2.147589 0.798868  
 H19 -3.369523 0.924238 -1.396862

[His-H<sub>im</sub>]<sub>10</sub>

O1 -3.314052 0.548305 0.535997  
 C2 -2.521042 -0.133824 -0.057972  
 O3 -2.888196 -1.396313 -0.448011  
 C4 -1.083342 0.242220 -0.372141  
 N5 -0.951047 1.689621 -0.479782  
 C6 -0.139099 -0.412829 0.694979  
 H7 -2.148692 -1.806216 -0.914186  
 H8 -0.817010 -0.198867 -1.342631  
 H9 -1.456437 2.118850 0.291056  
 H10 0.043610 1.908157 -0.363233  
 C11 1.307791 -0.262860 0.341353  
 H12 -0.371355 -1.481206 0.795712  
 H13 -0.374525 0.060032 1.658675  
 C14 2.257159 -1.246145 0.079821  
 N15 3.450656 -0.654149 -0.237421  
 C16 3.164668 0.657361 -0.161036  
 N17 1.896606 0.967562 0.183537  
 H18 2.145388 -2.324384 0.117778  
 H19 3.906696 1.422924 -0.361417

[His-H<sub>im</sub>]<sub>11</sub>

O1 2.225750 -1.158666 0.940848  
 C2 1.915233 -0.401152 -0.143427  
 O3 2.182160 -0.761201 -1.266370  
 C4 1.340722 0.958495 0.244451  
 N5 1.029546 1.787307 -0.915103  
 C6 0.105554 0.838325 1.180607  
 H7 2.496010 -2.021676 0.597057  
 H8 2.145811 1.435132 0.825380  
 H9 1.584999 1.479500 -1.708180  
 H10 0.056778 1.606160 -1.165126  
 C11 -1.092372 0.223409 0.524638  
 H12 -0.135368 1.854849 1.510512  
 H13 0.408156 0.267470 2.064329

C14 -2.299366 0.811835 0.150673  
N15 -3.100662 -0.128927 -0.439847  
C16 -2.334978 -1.236164 -0.401295  
N17 -1.118189 -1.098690 0.163180  
H18 -2.626144 1.836912 0.289121  
H19 -2.677152 -2.185724 -0.800410

[His-H<sub>im</sub>]<sub>-12</sub>

O1 2.254978 -1.523872 0.301604  
C2 1.853973 -0.413819 -0.398665  
O3 1.861019 -0.402345 -1.601051  
C4 1.444495 0.704380 0.545028  
N5 1.274709 1.949099 -0.202121  
C6 0.200038 0.277899 1.388941  
H7 2.414254 -2.207613 -0.364373  
H8 2.289390 0.827144 1.236335  
H9 0.386854 1.874903 -0.707539  
H10 1.114128 2.688271 0.477577  
C11 -1.039865 0.022978 0.588365  
H12 0.040703 1.095844 2.108347  
H13 0.453124 -0.614119 1.971174  
C14 -1.801162 -1.138272 0.491627  
N15 -2.860827 -0.922606 -0.348201  
C16 -2.688203 0.357446 -0.723850  
N17 -1.618544 0.990870 -0.198898  
H18 -1.641687 -2.094206 0.978492  
H19 -3.367770 0.854303 -1.408580

[His-H<sub>im</sub>]<sub>-13</sub>

O1 1.109692 1.600300 -1.049662  
C2 1.682686 0.789663 -0.139029  
O3 2.351592 1.218196 0.777549  
C4 1.380764 -0.675587 -0.367725  
N5 2.642158 -1.417637 -0.188500  
C6 0.234055 -1.121380 0.595164  
H7 1.239947 2.508544 -0.738202  
H8 1.027629 -0.805885 -1.391382  
H9 3.044860 -1.156598 0.708640  
H10 2.429035 -2.409986 -0.139252  
C11 -1.108446 -0.520749 0.326377  
H12 0.555507 -0.907520 1.621984  
H13 0.181572 -2.215079 0.490561  
C14 -1.818573 0.430933 1.054507  
N15 -3.002944 0.696741 0.421030  
C16 -2.947825 -0.106808 -0.659306  
N17 -1.840646 -0.866481 -0.779742  
H18 -1.543765 0.918669 1.983684  
H19 -3.751000 -0.144890 -1.388574

[His-H<sub>im</sub>]<sub>-14</sub>

O1 1.056368 -1.571924 1.050477  
C2 1.663056 -0.780749 0.146374  
O3 2.329110 -1.217076 -0.766848  
C4 1.414372 0.691735 0.394547  
N5 2.677748 1.407409 0.144901  
C6 0.229558 1.180374 -0.504562  
H7 1.057027 -2.469114 0.686273  
H8 1.127094 0.819978 1.440387  
H9 3.074645 1.057206 -0.724005  
H10 2.475676 2.392845 0.001487  
C11 -1.108010 0.553492 -0.268330  
H12 0.542739 1.037134 -1.547149  
H13 0.160095 2.262948 -0.331120  
C14 -2.198076 1.046311 0.445577  
N15 -3.218157 0.135016 0.406864  
C16 -2.693402 -0.865467 -0.327707  
N17 -1.432698 -0.681404 -0.768233  
H18 -2.298266 1.994124 0.964381  
H19 -3.256070 -1.764444 -0.559404

**[His-H]<sup>-</sup>(H<sub>2</sub>O)<sub>1,2</sub>****[His-H]<sup>-</sup>(H<sub>2</sub>O)\_1**

O1 -1.157514 -1.013498 -0.003219  
 C2 -1.614560 0.165462 -0.103350  
 O3 -2.819256 0.493726 -0.073116  
 C4 -0.572657 1.318532 -0.320698  
 N5 -1.240036 2.623413 -0.194072  
 C6 0.640129 1.257102 0.652158  
 H7 -0.184236 1.168580 -1.339004  
 H8 -2.242437 2.437019 -0.207678  
 H9 -1.017266 3.221960 -0.981236  
 C10 1.742852 0.312664 0.281851  
 H11 1.063295 2.263553 0.701443  
 H12 0.264096 1.034290 1.658391  
 C13 3.109815 0.463122 0.174063  
 N14 3.706002 -0.725938 -0.191478  
 C15 2.705366 -1.580731 -0.307065  
 N16 1.507172 -1.003807 -0.027164  
 H17 3.692645 1.357126 0.343168  
 H18 0.525500 -1.340517 -0.072871  
 H19 2.798225 -2.618239 -0.592135  
 O20 -3.781698 -2.218736 0.182001  
 H21 -2.809601 -2.232294 0.157501  
 H22 -3.900120 -1.255996 0.114342

**[His-H]<sup>-</sup>(H<sub>2</sub>O)\_2**

O1 1.793308 -1.717565 -0.035553  
 C2 2.589795 -0.737829 0.093064  
 O3 3.831214 -0.776179 0.049419  
 C4 1.935518 0.674114 0.366328  
 N5 2.973089 1.717824 0.354042  
 C6 0.813691 1.046883 -0.646615  
 H7 1.468010 0.597704 1.358525  
 H8 3.863744 1.220523 0.303768  
 H9 2.960309 2.249038 1.217387  
 C10 -0.530243 0.432142 -0.395620  
 H11 0.700723 2.133618 -0.621904  
 H12 1.164837 0.798564 -1.656125  
 C13 -1.808654 0.946221 -0.359095  
 N14 -2.717410 -0.057479 -0.090721  
 C15 -1.989014 -1.157587 0.037288  
 N16 -0.671852 -0.909216 -0.142863  
 H17 -2.125765 1.966725 -0.513828  
 H18 0.214760 -1.486703 -0.061245  
 H19 -2.379864 -2.138858 0.259435  
 O20 -5.498878 0.198215 0.348487  
 H21 -4.539850 0.096166 0.122895  
 H22 -5.485410 0.445881 1.276973

**[His-H]<sup>-</sup>(H<sub>2</sub>O)\_3**

O1 -0.490436 -1.780853 0.066846  
 C2 -1.299692 -0.817424 0.153989  
 O3 -2.483059 -0.886154 0.564568  
 C4 -0.769675 0.595229 -0.294633  
 N5 -1.782740 1.660522 -0.298766  
 C6 0.429113 1.066292 0.575517  
 H7 -0.411631 0.485701 -1.324310  
 H8 -2.199551 1.705459 0.628989  
 H9 -2.556329 1.380799 -0.896520  
 C10 1.774692 0.513547 0.212421  
 H11 0.479141 2.154461 0.486264  
 H12 0.204644 0.845688 1.628638  
 C13 3.017812 1.097074 0.082285  
 N14 3.966780 0.154427 -0.254163  
 C15 3.296871 -0.982187 -0.329545  
 N16 1.976995 -0.817874 -0.051793  
 H17 3.277443 2.137983 0.210748  
 H18 1.155081 -1.462581 -0.071232  
 H19 3.721214 -1.942291 -0.583708  
 O20 -4.816378 0.133434 -0.334158  
 H21 -5.213509 -0.672495 -0.674571  
 H22 -3.959498 -0.178853 0.050506

**[His-H]<sup>-</sup>(H<sub>2</sub>O)\_4**

O1 2.524906 -0.617968 -0.862512  
 C2 1.630886 -0.472776 -0.009200  
 O3 1.462001 0.524454 0.766205  
 C4 0.563870 -1.608746 0.089179  
 N5 0.155508 -1.824135 1.484055  
 C6 -0.617456 -1.312164 -0.881891  
 H7 1.054429 -2.509056 -0.290711  
 H8 0.299319 -0.949942 1.984106  
 C9 -1.575070 -0.236924 -0.455262  
 H10 -0.182871 -1.075201 -1.861034  
 H11 -1.199733 -2.231234 -1.018750  
 C12 -2.945324 -0.130591 -0.564781  
 N13 -3.389531 1.071517 -0.056185  
 C14 -2.296702 1.680298 0.363736  
 N15 -1.178454 0.939740 0.138316  
 H16 -3.630904 -0.851404 -0.986864  
 H17 -2.261215 2.650418 0.836671  
 H18 -0.833617 -2.046042 1.545485  
 H19 -0.205219 1.093025 0.452237  
 O20 3.827175 1.876736 -0.220225  
 H21 3.711751 1.045847 -0.714123  
 H22 3.061511 1.783389 0.371246

**[His-H]<sup>-</sup>(H<sub>2</sub>O)\_5**

O1 -0.132599 2.125288 -0.541839

C2 -1.152820 1.586060 -0.027836  
 O3 -2.309786 2.046534 0.018984  
 C4 -0.937583 0.186186 0.672035  
 N5 -2.261829 -0.397596 0.976825  
 C6 -0.089994 -0.822000 -0.148629  
 H7 -0.389401 0.403993 1.599871  
 H8 -2.911742 0.393023 0.940176  
 H9 -2.279390 -0.785750 1.914750  
 C10 1.395417 -0.640797 -0.066572  
 H11 -0.323325 -1.828810 0.208941  
 H12 -0.421280 -0.785793 -1.193874  
 C13 2.435845 -1.505072 0.204837  
 N14 3.645517 -0.844797 0.147205  
 C15 3.331028 0.404131 -0.151082  
 N16 1.991070 0.573744 -0.295157  
 H17 2.379112 -2.559698 0.433061  
 H18 1.376253 1.403964 -0.459253  
 H19 4.035425 1.214310 -0.269247  
 O20 -3.580897 -2.253219 -0.748541  
 H21 -3.715284 -1.734606 -1.547032  
 H22 -3.078787 -1.639958 -0.154845

[His-H]<sup>+</sup>(H<sub>2</sub>O)<sub>6</sub>

O1 -2.704477 1.193878 0.589419  
 C2 -1.514232 0.974757 0.293934  
 O3 -0.680239 1.802493 -0.180770  
 C4 -1.014449 -0.501228 0.503727  
 N5 -1.033806 -1.179477 -0.809527  
 C6 0.332906 -0.630161 1.274862  
 H7 -1.774521 -0.985330 1.120972  
 H8 -0.480805 -0.644321 -1.473794  
 C9 1.589197 -0.350503 0.506917  
 H10 0.275284 0.022194 2.156375  
 H11 0.408657 -1.654901 1.659000  
 C12 2.773535 -1.042667 0.361731  
 N13 3.646778 -0.349807 -0.449908  
 C14 2.987812 0.743535 -0.793109  
 N15 1.749625 0.792585 -0.235997  
 H16 3.044307 -1.993029 0.799332  
 H17 3.363993 1.521552 -1.440861  
 H18 -0.596330 -2.095498 -0.741703  
 H19 0.924066 1.429621 -0.352910  
 O20 -4.062461 -1.015175 -0.767447  
 H21 -3.156387 -1.241831 -1.037988  
 H22 -3.897653 -0.213528 -0.238391

[His-H]<sup>+</sup>(H<sub>2</sub>O)<sub>7</sub>

O1 2.069617 -1.596880 -1.374048  
 C2 1.554473 -0.686228 -0.716989  
 O3 1.415350 0.541693 -1.048532

C4 0.934660 -1.082923 0.665580  
 N5 1.092160 0.006524 1.641092  
 C6 -0.533040 -1.565805 0.464546  
 H7 1.504622 -1.946565 1.016267  
 H8 0.789939 0.873886 1.204488  
 C9 -1.545960 -0.498289 0.162127  
 H10 -0.517975 -2.316982 -0.335249  
 H11 -0.866511 -2.085570 1.371296  
 C12 -2.859270 -0.340919 0.550932  
 N13 -3.409915 0.789667 -0.014471  
 C14 -2.433658 1.313359 -0.731345  
 N15 -1.294569 0.572694 -0.666315  
 H16 -3.435647 -0.982909 1.201648  
 H17 -2.497205 2.224461 -1.307455  
 H18 0.496556 -0.147386 2.450729  
 H19 2.728939 1.702081 -0.178553  
 O20 3.232436 2.060654 0.577222  
 H21 2.985415 1.435807 1.272149  
 H22 -0.344324 0.782074 -1.023701

[His-H]<sup>+</sup>(H<sub>2</sub>O)<sub>8</sub>

O1 -3.936522 -0.483149 -0.401253  
 C2 -2.750448 -0.456549 -0.126212  
 O3 -2.030936 -1.558330 -0.008575  
 C4 -2.035528 0.896218 0.108495  
 N5 -1.709739 1.023930 1.539440  
 C6 -0.838317 1.143654 -0.860947  
 H7 -2.805841 1.637535 -0.112014  
 H8 -0.939168 0.398118 1.762017  
 C9 0.439030 0.462350 -0.462762  
 H10 -1.151728 0.845486 -1.872221  
 H11 -0.659618 2.224637 -0.904789  
 C12 1.745613 0.914209 -0.437078  
 N13 2.563876 -0.091382 0.021412  
 C14 1.726272 -1.106438 0.265197  
 N15 0.433747 -0.834110 -0.005638  
 H16 2.138733 1.882619 -0.716027  
 H17 2.053126 -2.062140 0.653176  
 H18 -1.364924 1.963544 1.717563  
 H19 -0.996642 -1.374166 0.056616  
 O20 5.352749 -0.065858 0.174498  
 H21 4.355810 -0.052604 0.190279  
 H22 5.552995 -0.414068 -0.698615

[His-H]<sup>+</sup>(H<sub>2</sub>O)<sub>9</sub>

O1 3.457991 -1.075137 -0.260685  
 C2 2.502138 -0.356156 -0.063854  
 O3 2.586364 0.962413 -0.298183  
 C4 1.147463 -0.887272 0.409244  
 N5 0.744251 -0.204351 1.645407

C6 0.120125 -0.860829 -0.800937  
 H7 1.324580 -1.930621 0.673885  
 H8 0.592343 0.786458 1.477705  
 C9 -1.293120 -0.537034 -0.428632  
 H10 0.458572 -0.130866 -1.543082  
 H11 0.163588 -1.839473 -1.288601  
 C12 -2.399012 -1.347938 -0.221300  
 N13 -3.485064 -0.579859 0.118607  
 C14 -2.997505 0.664975 0.111942  
 N15 -1.687341 0.764148 -0.209891  
 H16 -2.470388 -2.424768 -0.312749  
 H17 -3.599922 1.535059 0.344802  
 H18 -0.168918 -0.564434 1.912540  
 H19 1.725140 1.454380 -0.192040  
 O20 0.308924 2.395592 -0.080003  
 H21 0.246073 3.109594 -0.719980  
 H22 -0.580743 1.827676 -0.159156

[His-H]<sup>+</sup>(H<sub>2</sub>O)<sub>10</sub>

O1 1.520452 -0.864977 0.952129  
 C2 1.583175 0.126061 0.172682  
 O3 2.304368 0.250262 -0.849088  
 C4 0.670987 1.352238 0.506977  
 N5 1.397982 2.631495 0.341177  
 C6 -0.582720 1.406587 -0.386588  
 H7 0.359131 1.271915 1.552392  
 H8 1.917629 2.538063 -0.532486  
 C9 -1.610648 0.333855 -0.167978  
 H10 -1.063885 2.376762 -0.228978  
 H11 -0.255562 1.390526 -1.434448  
 C12 -1.477903 -0.892636 0.434918  
 N13 -2.725556 -1.482840 0.354595  
 C14 -3.551352 -0.603723 -0.286434  
 N15 -2.916067 0.498053 -0.611969  
 H16 -0.611284 -1.362134 0.875701  
 H17 -2.966888 -2.399153 0.694309  
 H18 -4.592446 -0.818121 -0.479449  
 H19 2.118416 2.675835 1.058380  
 O20 3.476192 -2.364666 -0.477434  
 H21 3.373463 -1.529594 -0.966303  
 H22 2.829583 -2.170292 0.227934

[His-H]<sup>+</sup>(H<sub>2</sub>O)<sub>11</sub>

O1 -0.724481 2.313957 -0.019304  
 C2 -1.276280 1.192947 -0.081577  
 O3 -2.097525 0.799349 -0.960520  
 C4 -0.910057 0.165898 1.047844  
 N5 -2.082091 -0.496820 1.656737  
 C6 0.041328 -0.937648 0.550782  
 H7 -0.406043 0.730140 1.838478

H8 -2.594718 -0.992024 0.927560  
 C9 1.423639 -0.502866 0.157310  
 H10 0.131338 -1.685595 1.345474  
 H11 -0.431456 -1.448504 -0.297926  
 C12 1.896287 0.756620 -0.118056  
 N13 3.232511 0.591063 -0.433425  
 C14 3.510761 -0.743112 -0.339302  
 N15 2.448818 -1.428713 0.014875  
 H16 1.383222 1.706856 -0.129189  
 H17 3.871213 1.323462 -0.695740  
 H18 4.493501 -1.147672 -0.533565  
 H19 -2.721367 0.221167 1.987709  
 O20 -3.549130 -1.419942 -1.203904  
 H21 -3.036142 -0.566430 -1.118348  
 H22 -3.029203 -1.938061 -1.823955

[His-H]<sup>+</sup>(H<sub>2</sub>O)<sub>12</sub>

O1 -0.186961 -2.544906 -0.646733  
 C2 -0.952206 -1.843889 0.059988  
 O3 -1.604926 -2.171550 1.079401  
 C4 -1.134274 -0.340417 -0.376221  
 N5 -2.546587 0.085721 -0.177296  
 C6 -0.236570 0.618101 0.429563  
 H7 -0.894758 -0.247812 -1.439235  
 H8 -2.819982 -0.360320 0.703056  
 C9 1.241570 0.531359 0.176184  
 H10 -0.545038 1.646195 0.212764  
 H11 -0.435797 0.454550 1.496925  
 C12 1.978102 -0.500556 -0.350162  
 N13 3.287637 -0.057532 -0.349381  
 C14 3.291602 1.205572 0.171598  
 N15 2.079413 1.591422 0.496242  
 H16 1.657242 -1.474970 -0.690625  
 H17 4.086091 -0.579705 -0.670363  
 H18 4.195215 1.787243 0.282178  
 H19 -3.111238 -0.392220 -0.877067  
 O20 -3.369567 2.798509 -0.337797  
 H21 -3.068094 1.853334 -0.276178  
 H22 -2.644601 3.298992 0.046919

[His-H]<sup>+</sup>(H<sub>2</sub>O)<sub>13</sub>

O1 -2.455393 -1.545018 -0.126309  
 C2 -2.429836 -0.348245 0.261845  
 O3 -2.987947 0.163509 1.260701  
 C4 -1.587153 0.656597 -0.611089  
 N5 -2.257711 1.972896 -0.728015  
 C6 -0.185115 0.906380 -0.020331  
 H7 -1.475703 0.236943 -1.615707  
 H8 -2.667559 2.135796 0.194179  
 C9 0.775233 -0.247158 -0.054976



H10 0.261881 1.741551 -0.570059  
 H11 -0.309401 1.246746 1.016348  
 C12 0.523002 -1.590185 -0.177061  
 N13 1.760023 -2.207254 -0.140323  
 C14 2.703975 -1.236100 0.002342  
 N15 2.146163 -0.046097 0.055034  
 H16 -0.424066 -2.105232 -0.266026  
 H17 1.925172 -3.198334 -0.200396  
 H18 3.762038 -1.443395 0.055520  
 H19 -3.061829 1.856056 -1.340328  
 O20 3.638677 2.385265 0.298108  
 H21 2.961808 3.066822 0.340789  
 H22 3.125009 1.548443 0.214435

[His-H]<sup>+</sup>(H<sub>2</sub>O)<sub>2</sub>\_1

O1 -0.855437 -0.686694 0.031941  
 C2 -1.142647 0.529552 -0.136494  
 O3 -2.296425 1.017608 -0.213904  
 C4 0.044358 1.533373 -0.308354  
 N5 -0.444604 2.910966 -0.154665  
 C6 1.222554 1.288227 0.674711  
 H7 0.421201 1.350318 -1.326944  
 H8 -1.451614 2.888284 -0.303797  
 H9 -0.028875 3.523033 -0.847870  
 C10 2.199613 0.219415 0.291808  
 H11 1.775188 2.227917 0.755961  
 H12 0.805807 1.092093 1.669878  
 C13 3.572956 0.210861 0.168115  
 N14 4.024576 -1.038997 -0.201105  
 C15 2.932761 -1.774300 -0.303127  
 N16 1.811912 -1.062675 -0.011064  
 H17 4.256205 1.032301 0.328833  
 H18 0.807694 -1.295922 -0.044864  
 H19 2.901614 -2.815982 -0.585663  
 O20 -2.914709 -2.713230 0.077685  
 H21 -2.163230 -2.089896 0.078686  
 H22 -3.672119 -2.112349 0.000545  
 O23 -4.650776 -0.309644 0.058897  
 H24 -3.791493 0.160062 -0.097767  
 H25 -4.842363 -0.132006 0.983936

[His-H]<sup>+</sup>(H<sub>2</sub>O)<sub>2</sub>\_2

O1 -1.669449 -1.076450 -0.051307  
 C2 -2.256647 0.047044 -0.131645  
 O3 -3.488124 0.237950 -0.084825  
 C4 -1.349130 1.310719 -0.338220  
 N5 -2.159637 2.532636 -0.233833  
 C6 -0.160509 1.388384 0.663876  
 H7 -0.922940 1.203075 -1.346164  
 H8 -3.134296 2.232941 -0.228661

H9 -2.016828 3.132112 -1.038412  
 C10 1.044832 0.564841 0.327039  
 H11 0.149975 2.434689 0.714226  
 H12 -0.533333 1.131547 1.663004  
 C13 2.390525 0.855016 0.274704  
 N14 3.108409 -0.268809 -0.080692  
 C15 2.203585 -1.220930 -0.245876  
 N16 0.951980 -0.764174 -0.006439  
 H17 2.879707 1.797336 0.470468  
 H18 0.002101 -1.192504 -0.085690  
 H19 2.414350 -2.237610 -0.540087  
 O20 -4.137015 -2.574670 0.187687  
 H21 -3.171282 -2.474278 0.139292  
 H22 -4.372088 -1.634083 0.122202  
 O23 5.931402 -0.517846 -0.223964  
 H24 6.120919 -0.695164 0.701383  
 H25 4.947997 -0.417954 -0.244804

[His-H]<sup>+</sup>(H<sub>2</sub>O)<sub>2</sub>\_3

O1 -2.054473 0.744373 -0.885063  
 C2 -1.391396 1.034521 0.148437  
 O3 -1.625865 0.666165 1.327068  
 C4 -0.145564 1.934209 -0.101865  
 N5 0.536133 2.370923 1.122358  
 C6 0.825182 1.251426 -1.098347  
 H7 -0.537306 2.815209 -0.626091  
 H8 -0.089779 2.152131 1.895756  
 C9 1.646489 0.116316 -0.560961  
 H10 0.224988 0.924903 -1.952183  
 H11 1.533964 2.001920 -1.464169  
 C12 3.016018 -0.016220 -0.467575  
 N13 3.368023 -1.240300 0.057888  
 C14 2.217870 -1.842688 0.285725  
 N15 1.151217 -1.078036 -0.073380  
 H16 3.761785 0.709170 -0.759853  
 H17 2.093041 -2.826091 0.713570  
 H18 1.356067 1.788384 1.273833  
 H19 0.174458 -1.356894 0.088533  
 O20 -3.627559 -1.400669 -0.859587  
 H21 -3.092362 -0.555552 -0.904829  
 H22 -4.337713 -1.190589 -0.246341  
 O23 -1.412271 -2.058554 0.857937  
 H24 -1.582557 -1.180989 1.262882  
 H25 -2.142440 -2.125621 0.215508

[His-H]<sup>+</sup>(H<sub>2</sub>O)<sub>2</sub>\_4

O1 0.607729 -1.619851 -0.185269  
 C2 1.325624 -0.697964 0.300032  
 O3 2.562205 -0.732445 0.478491  
 C4 0.592422 0.608555 0.765819

N5 1.602856 1.659847 1.004326  
C6 -0.486473 1.126190 -0.221413  
H7 0.085448 0.336769 1.703115  
H8 2.485420 1.167020 1.155346  
H9 1.382359 2.190192 1.841321  
C10 -1.825763 0.461202 -0.132937  
H11 -0.632794 2.192179 -0.027293  
H12 -0.089118 1.054497 -1.240988  
C13 -3.107280 0.951417 0.003183  
N14 -4.025047 -0.077824 0.021471  
C15 -3.301355 -1.175917 -0.097904  
N16 -1.973872 -0.902288 -0.199747  
H17 -3.415592 1.983754 0.083138  
H18 -1.130104 -1.500671 -0.244480  
H19 -3.689520 -2.183508 -0.112874  
O20 2.837919 -3.441914 -0.521843  
H21 1.904881 -3.175622 -0.580846  
H22 3.189692 -2.617332 -0.147219  
O23 2.334692 3.570687 -1.006515  
H24 2.039839 2.913740 -0.329751  
H25 2.718501 3.028115 -1.701408

[His-H]<sup>+</sup>(H<sub>2</sub>O)<sub>2</sub>\_5

O1 0.456032 1.310986 0.296337  
C2 1.135928 0.270172 0.079624  
O3 2.379155 0.241195 -0.100371  
C4 0.370850 -1.086927 -0.026748  
N5 1.253636 -2.194470 0.363811  
C6 -0.923724 -1.163682 0.823231  
H7 0.076584 -1.151530 -1.088653  
H8 2.208787 -1.973495 0.099392  
H9 0.991364 -3.047056 -0.119858  
C10 -2.139623 -0.497910 0.256821  
H11 -1.164191 -2.222697 0.956169  
H12 -0.699570 -0.771660 1.821501  
C13 -3.408919 -0.954632 -0.028739  
N14 -4.196732 0.062716 -0.525760  
C15 -3.407999 1.121057 -0.542840  
N16 -2.163811 0.834270 -0.075803  
H17 -3.796305 -1.954832 0.101142  
H18 -1.298774 1.388348 -0.001520  
H19 -3.687925 2.106721 -0.883670  
O20 2.612707 3.188424 0.283918  
H21 1.709319 2.829938 0.361472  
H22 3.073781 2.361227 0.083375  
O23 4.523197 -1.328557 -0.778456  
H24 5.063278 -1.163002 -0.000821  
H25 3.744205 -0.744419 -0.643783

[His-H]<sup>+</sup>(H<sub>2</sub>O)<sub>2</sub>\_6

O1 2.042734 -1.172908 -0.672578  
C2 1.142778 -0.787536 0.088545  
O3 1.072816 0.339074 0.690427  
C4 -0.063203 -1.749324 0.303309  
N5 -0.506375 -1.721125 1.702654  
C6 -1.186199 -1.446225 -0.735672  
H7 0.313888 -2.746762 0.063569  
H8 -0.320059 -0.793961 2.075337  
C9 -2.030469 -0.233463 -0.470926  
H10 -0.711794 -1.379548 -1.722871  
H11 -1.861154 -2.308881 -0.779609  
C12 -3.379870 -0.000417 -0.627652  
N13 -3.701149 1.294648 -0.280121  
C14 -2.557097 1.835437 0.091205  
N15 -1.519958 0.960852 -0.014564  
H16 -4.132408 -0.692942 -0.976260  
H17 -2.425997 2.846632 0.446564  
H18 -1.506503 -1.881680 1.773690  
H19 -0.542459 1.052103 0.300508  
O20 4.636643 0.096808 -0.825712  
H21 3.804065 -0.412599 -0.852860  
H22 4.390932 0.848051 -0.264663  
O23 3.042113 2.220530 0.538696  
H24 2.358597 1.509362 0.637143  
H25 2.815185 2.640737 -0.295852

[His-H]<sup>+</sup>(H<sub>2</sub>O)<sub>2</sub>\_7

O1 -2.603406 0.172727 0.544727  
C2 -1.382960 0.263330 0.295357  
O3 -0.779114 1.293526 -0.135231  
C4 -0.532893 -1.031410 0.511772  
N5 -0.382379 -1.703234 -0.795569  
C6 0.801469 -0.808698 1.283053  
H7 -1.149216 -1.685474 1.132411  
H8 0.040446 -1.063012 -1.462465  
C9 1.955924 -0.251204 0.507764  
H10 0.584623 -0.171821 2.150573  
H11 1.121993 -1.775919 1.687833  
C12 3.263353 -0.661843 0.356234  
N13 3.958545 0.208844 -0.455838  
C14 3.075279 1.130158 -0.794424  
N15 1.858260 0.901233 -0.233403  
H16 3.739665 -1.528644 0.791422  
H17 3.267078 1.974259 -1.439985  
H18 0.253550 -2.492682 -0.712392  
H19 0.930517 1.352316 -0.346771  
O20 -3.108017 2.998802 -0.038300  
H21 -3.419447 2.119395 0.229803  
H22 -2.177216 2.769574 -0.202402

O23 -3.323949 -2.377877 -0.760133  
H24 -2.390732 -2.331896 -1.030014  
H25 -3.407395 -1.553425 -0.251391

[His-H]<sup>+</sup>(H<sub>2</sub>O)<sub>2</sub>\_8

O1 1.087019 -2.203174 -0.456980  
C2 1.999373 -1.492066 0.055520  
O3 3.207795 -1.771676 0.152554  
C4 1.555471 -0.109160 0.677859  
N5 2.765756 0.672400 1.007749  
C6 0.615215 0.730820 -0.227676  
H7 0.999255 -0.362807 1.591477  
H8 3.528737 -0.010791 1.006973  
H9 2.695717 1.072630 1.937971  
C10 -0.828556 0.330209 -0.209947  
H11 0.678149 1.773766 0.093998  
H12 1.003878 0.704400 -1.253097  
C13 -1.998722 1.038009 -0.042591  
N14 -3.083629 0.188946 -0.123525  
C15 -2.568029 -1.013449 -0.332097  
N16 -1.217423 -0.973093 -0.396337  
H17 -2.123023 2.097755 0.122126  
H18 -0.461817 -1.703602 -0.479902  
H19 -3.137101 -1.924233 -0.439054  
O20 -5.819032 0.793036 0.309403  
H21 -4.875254 0.596689 0.087256  
H22 -5.833203 0.773772 1.270140  
O23 3.796867 2.748381 -0.668151  
H24 3.399100 2.041890 -0.100797  
H25 4.042921 2.284039 -1.473314

[His-H]<sup>+</sup>(H<sub>2</sub>O)<sub>2</sub>\_9

O1 3.223752 -0.228034 -0.858480  
C2 2.302722 -0.251489 -0.024564  
O3 1.930420 0.702013 0.737396  
C4 1.471458 -1.569943 0.068788  
N5 1.131193 -1.872310 1.464509  
C6 0.244925 -1.496258 -0.889345  
H7 2.119935 -2.356735 -0.325313  
H8 1.066002 -0.993077 1.970718  
C9 -0.893283 -0.623037 -0.444482  
H10 0.614144 -1.174036 -1.870977  
H11 -0.154446 -2.507737 -1.028835  
C12 -2.258523 -0.768990 -0.550522  
N13 -2.903582 0.325911 -0.013979  
C14 -1.937623 1.118681 0.418564  
N15 -0.713111 0.593877 0.174166  
H16 -2.809730 -1.591347 -0.981407  
H17 -2.080877 2.066664 0.913860  
H18 0.229230 -2.333406 1.534253

H19 0.228395 0.913645 0.479224  
O20 4.018419 2.479718 -0.218612  
H21 4.080577 1.641443 -0.708344  
H22 3.273841 2.241280 0.358393  
O23 -5.699989 0.841486 0.032002  
H24 -4.736134 0.630432 0.075621  
H25 -5.791307 1.315270 -0.799150

[His-H]<sup>+</sup>(H<sub>2</sub>O)<sub>2</sub>\_10

O1 -0.247561 -2.220632 -0.167988  
C2 -1.131821 -1.367430 0.104434  
O3 -2.301252 -1.606554 0.490145  
C4 -0.719121 0.142012 -0.055095  
N5 -1.817432 1.101022 0.175551  
C6 0.470275 0.516897 0.872579  
H7 -0.393791 0.272891 -1.093079  
H8 -2.159274 0.972133 1.126328  
H9 -2.615489 0.842136 -0.402596  
C10 1.835715 0.187232 0.349756  
H11 0.433452 1.595594 1.046075  
H12 0.315544 0.038205 1.849256  
C13 3.009764 0.907816 0.288200  
N14 4.016464 0.151829 -0.274640  
C15 3.449896 -1.008802 -0.551673  
N16 2.140443 -1.038040 -0.189409  
H17 3.182173 1.922124 0.617841  
H18 1.385464 -1.745758 -0.305438  
H19 3.942821 -1.850871 -1.014538  
O20 -4.591555 -0.520797 -0.418268  
H21 -4.878495 -1.169780 -1.065989  
H22 -3.788865 -0.930603 -0.009035  
O23 -1.068075 3.810776 -0.371177  
H24 -1.366122 2.888218 -0.170547  
H25 -0.254455 3.693340 -0.869697

[His-H]<sup>+</sup>(H<sub>2</sub>O)<sub>2</sub>\_11

O1 1.961697 -1.751948 0.359455  
C2 0.959467 -1.190174 -0.141361  
O3 0.152867 -1.687745 -0.972187  
C4 0.669047 0.275607 0.323617  
N5 0.608808 1.154186 -0.857903  
C6 -0.577062 0.356833 1.256761  
H7 1.523105 0.586893 0.929023  
H8 0.123970 0.662941 -1.604321  
C9 -1.927230 0.279368 0.607387  
H10 -0.472236 -0.431495 2.014159  
H11 -0.535083 1.307069 1.801919  
C12 -3.088408 0.996327 0.804980  
N13 -4.095854 0.534202 -0.014580  
C14 -3.542605 -0.446332 -0.704301

N15 -2.242465 -0.645140 -0.359956  
 H16 -3.252315 1.812477 1.493976  
 H17 -4.037434 -1.035877 -1.461781  
 H18 0.076555 1.997089 -0.658515  
 H19 -1.500961 -1.242267 -0.775832  
 O20 3.485268 2.023942 -0.877515  
 H21 2.558268 1.764637 -1.035968  
 H22 3.861950 1.259909 -0.408961  
 O23 4.272655 -0.385136 0.652589  
 H24 3.447513 -0.929089 0.550174  
 H25 4.374092 -0.277708 1.601959

[His-H]<sup>+</sup>(H<sub>2</sub>O)<sub>2</sub>\_12

O1 -2.036535 0.637765 1.496427  
 C2 -1.364268 0.078917 0.613335  
 O3 -1.311367 0.380094 -0.625097  
 C4 -0.426773 -1.073921 1.082250  
 N5 -0.296356 -2.103070 0.039634  
 C6 0.925244 -0.477751 1.576785  
 H7 -0.912415 -1.525813 1.949833  
 H8 0.001024 -1.657596 -0.824818  
 C9 1.860527 0.007443 0.506902  
 H10 0.684991 0.333307 2.275294  
 H11 1.459974 -1.239111 2.156819  
 C12 3.230163 -0.075119 0.381672  
 N13 3.660985 0.553632 -0.767028  
 C14 2.560333 1.004843 -1.335239  
 N15 1.449753 0.711136 -0.604970  
 H16 3.926036 -0.547826 1.059704  
 H17 2.509954 1.543196 -2.269784  
 H18 0.421280 -2.777132 0.293220  
 H19 0.456992 0.834757 -0.850524  
 O20 -3.054081 2.732150 -0.185254  
 H21 -2.917012 2.215622 0.629713  
 H22 -2.557499 2.164817 -0.793951  
 O23 -2.704687 -2.087784 -1.748376  
 H24 -2.072066 -2.426862 -1.093080  
 H25 -2.559936 -1.133511 -1.661717

[His-H]<sup>+</sup>(H<sub>2</sub>O)<sub>2</sub>\_13

O1 2.274222 -0.918476 -1.477877  
 C2 1.256916 -0.431185 -0.956645  
 O3 0.813447 0.752783 -1.101423  
 C4 0.481749 -1.343986 0.052068  
 N5 0.675600 -0.768575 1.398958  
 C6 -0.999579 -1.622602 -0.339404  
 H7 0.997258 -2.306682 0.034925  
 H8 0.339264 0.191441 1.407018  
 C9 -1.996122 -0.533023 -0.080437  
 H10 -1.010881 -1.904135 -1.401148

H11 -1.338605 -2.508151 0.211507  
 C12 -3.258127 -0.543119 0.475003  
 N13 -3.803988 0.722618 0.471822  
 C14 -2.874995 1.486896 -0.073162  
 N15 -1.772401 0.776784 -0.430636  
 H16 -3.801146 -1.390349 0.868879  
 H17 -2.950148 2.553506 -0.223431  
 H18 0.133615 -1.279586 2.091065  
 H19 3.566562 -0.599508 0.229101  
 O20 3.616686 -0.327370 1.159598  
 H21 2.711944 -0.518434 1.475962  
 H22 -0.835629 1.066039 -0.781153  
 O23 2.735784 2.462590 0.314841  
 H24 2.114771 2.048778 -0.310333  
 H25 3.198347 1.697191 0.690951

[His-H]<sup>+</sup>(H<sub>2</sub>O)<sub>2</sub>\_14

O1 1.878466 -1.083597 -1.311877  
 C2 1.117361 -0.321749 -0.694083  
 O3 0.773558 0.861579 -1.014173  
 C4 0.498935 -0.873879 0.630901  
 N5 0.500339 0.180929 1.661124  
 C6 -0.890411 -1.523962 0.365060  
 H7 1.166589 -1.669368 0.967284  
 H8 -0.040063 0.972800 1.321917  
 C9 -2.028633 -0.578310 0.108446  
 H10 -0.768138 -2.214472 -0.479350  
 H11 -1.166731 -2.140847 1.228543  
 C12 -3.349482 -0.602530 0.501930  
 N13 -4.036880 0.476825 -0.010667  
 C14 -3.136176 1.150333 -0.700252  
 N15 -1.914004 0.553342 -0.668510  
 H16 -3.839986 -1.340513 1.120258  
 H17 -3.314476 2.071919 -1.233986  
 H18 0.051292 -0.148953 2.511709  
 H19 -0.996235 0.891671 -1.010571  
 O20 4.594085 -0.434793 -0.234680  
 H21 4.219555 0.348714 0.200208  
 H22 3.833444 -0.786999 -0.725630  
 O23 2.888366 1.776105 0.872052  
 H24 2.277464 1.248338 1.420114  
 H25 2.385731 1.836268 0.043284

[His-H]<sup>+</sup>(H<sub>2</sub>O)<sub>2</sub>\_15

O1 -3.420407 1.102345 0.405183  
 C2 -2.208835 0.931429 0.182577  
 O3 -1.397607 1.774353 -0.310657  
 C4 -1.640162 -0.495644 0.516871  
 N5 -1.544621 -1.254879 -0.747058  
 C6 -0.338086 -0.495770 1.371673

H7 -2.407344 -0.983427 1.121926  
H8 -0.986095 -0.734207 -1.417843  
C9 0.942344 -0.167602 0.665350  
H10 -0.491618 0.195477 2.210814  
H11 -0.220827 -1.492061 1.814717  
C12 2.184094 -0.764144 0.652778  
N13 3.046593 -0.050013 -0.152951  
C14 2.326358 0.957580 -0.623292  
N15 1.058372 0.930163 -0.151842  
H16 2.505863 -1.654198 1.172730  
H17 2.685602 1.714548 -1.303562  
H18 -1.069561 -2.141573 -0.596422  
H19 0.181088 1.486359 -0.357969  
O20 -4.579721 -1.276031 -0.867479  
H21 -3.649268 -1.459987 -1.080388  
H22 -4.494676 -0.432636 -0.388037  
O23 5.825552 -0.507974 -0.504614  
H24 6.161273 -0.024000 0.254767  
H25 4.846329 -0.387838 -0.442974

[His-H]<sup>+</sup>(H<sub>2</sub>O)<sub>2</sub>\_16

O1 2.906217 -1.335885 -1.369039  
C2 2.246220 -0.521530 -0.717643  
O3 1.909348 0.667495 -1.054827  
C4 1.693643 -1.007199 0.664659  
N5 1.702312 0.088560 1.644862  
C6 0.308763 -1.692747 0.465563  
H7 2.380490 -1.783186 1.009878  
H8 1.253135 0.901543 1.231555  
C9 -0.844594 -0.780114 0.158150  
H10 0.428133 -2.435926 -0.332960  
H11 0.050673 -2.252526 1.372699  
C12 -2.169933 -0.822317 0.529526  
N13 -2.863386 0.226990 -0.036647  
C14 -1.963639 0.899373 -0.734542  
N15 -0.738208 0.327318 -0.654697  
H16 -2.661451 -1.543542 1.165188  
H17 -2.153906 1.799274 -1.298807  
H18 1.171875 -0.163902 2.474694  
H19 3.061043 2.013776 -0.184784  
O20 3.507892 2.425929 0.578030  
H21 3.352867 1.759777 1.261396  
H22 0.185360 0.665513 -1.001415  
O23 -5.669085 0.665549 0.094573  
H24 -4.686926 0.560748 0.105978  
H25 -5.944072 0.140874 -0.662219

[His-H]<sup>+</sup>(H<sub>2</sub>O)<sub>2</sub>\_17

O1 -1.241422 -0.321983 -1.183387  
C2 -1.122059 0.627199 -0.370537

O3 -1.835927 0.864239 0.644306  
C4 0.025993 1.650719 -0.626896  
N5 -0.445182 3.047468 -0.498245  
C6 1.202004 1.461191 0.348342  
H7 0.382992 1.507045 -1.650425  
H8 -0.996410 3.081871 0.359167  
C9 1.993409 0.192102 0.212053  
H10 1.884179 2.306422 0.215834  
H11 0.811224 1.535999 1.371398  
C12 1.656090 -0.991124 -0.397809  
N13 2.738429 -1.828907 -0.207150  
C14 3.673227 -1.131125 0.502222  
N15 3.260925 0.086732 0.767796  
H16 0.756067 -1.286098 -0.913823  
H17 2.802164 -2.785507 -0.514466  
H18 4.624439 -1.556312 0.787267  
H19 -1.114280 3.226642 -1.243333  
O20 -2.926590 -2.557917 -0.664992  
H21 -3.337228 -2.191472 0.133973  
H22 -2.336971 -1.823002 -0.933840  
O23 -3.896774 -0.685046 1.430598  
H24 -4.620822 -0.256654 0.965663  
H25 -3.100836 -0.144090 1.169331

[His-H]<sup>+</sup>(H<sub>2</sub>O)<sub>2</sub>\_18

O1 -0.941686 1.528637 1.084664  
C2 -1.183299 0.436999 0.512686  
O3 -1.951579 0.273261 -0.481606  
C4 -0.480025 -0.833072 1.084457  
N5 -1.416933 -1.931328 1.393154  
C6 0.599910 -1.380829 0.136042  
H7 -0.005312 -0.534722 2.023494  
H8 -1.912965 -2.201430 0.544471  
C9 1.804959 -0.507710 -0.063884  
H10 0.935521 -2.343905 0.533386  
H11 0.139249 -1.591770 -0.837152  
C12 1.972949 0.826240 0.216157  
N13 3.265306 1.127815 -0.171784  
C14 3.818862 -0.018853 -0.665267  
N15 2.971829 -1.020080 -0.612807  
H16 1.289086 1.551880 0.627729  
H17 3.701366 2.033414 -0.116404  
H18 4.831495 -0.061928 -1.038903  
H19 -2.132332 -1.582145 2.025365  
O20 -2.613150 3.134231 -0.552839  
H21 -2.704656 2.252669 -0.946988  
H22 -2.000612 2.889099 0.168058  
O23 -3.056952 -1.934591 -1.526368  
H24 -3.981161 -1.674350 -1.562464  
H25 -2.594290 -1.120614 -1.192503

[His-H]<sup>+</sup>(H<sub>2</sub>O)<sub>2</sub>\_19

O1 3.905719 -1.464004 -0.185774  
C2 3.056673 -0.616914 -0.018643  
O3 3.347791 0.679851 -0.215247  
C4 1.617618 -0.950386 0.384320  
N5 1.276482 -0.241429 1.624755  
C6 0.652700 -0.736107 -0.852850  
H7 1.627866 -2.013890 0.625544  
H8 1.162493 0.750833 1.434475  
C9 -0.729776 -0.278527 -0.502759  
H10 1.093698 -0.001642 -1.534207  
H11 0.608563 -1.679917 -1.404563  
C12 -1.912636 -0.979546 -0.341204  
N13 -2.917264 -0.105811 -0.002916  
C14 -2.307727 1.087072 0.032299  
N15 -0.993052 1.052280 -0.258256  
H16 -2.097901 -2.038876 -0.459454  
H17 -2.830132 2.004755 0.271343  
H18 0.356118 -0.557757 1.919244  
H19 2.569298 1.287029 -0.138232  
O20 -5.644096 -0.635060 0.280068  
H21 -4.663382 -0.456075 0.250816  
H22 -5.903259 -0.585804 -0.644053  
O23 1.238939 2.412762 -0.152131  
H24 0.284417 2.009693 -0.212828  
H25 1.181116 3.244421 0.324529

[His-H]<sup>+</sup>(H<sub>2</sub>O)<sub>2</sub>\_20

O1 1.399535 -1.431690 0.954698  
C2 1.549829 -0.470970 0.154053  
O3 2.298471 -0.416688 -0.853182  
C4 0.715755 0.823554 0.433994  
N5 1.542377 2.034746 0.192841  
C6 -0.535187 0.918055 -0.459445  
H7 0.409795 0.822429 1.483369  
H8 2.062876 1.834341 -0.664150  
C9 -1.631504 -0.073322 -0.192835  
H10 -0.963056 1.918966 -0.344505  
H11 -0.214733 0.837099 -1.506281  
C12 -1.581372 -1.288163 0.444588  
N13 -2.869414 -1.786338 0.391885  
C14 -3.635741 -0.867750 -0.266907  
N15 -2.925057 0.174467 -0.630107  
H16 -0.747846 -1.806005 0.894195  
H17 -3.174236 -2.670877 0.763553  
H18 -4.691737 -1.009983 -0.444065  
H19 2.259092 2.070898 0.915090  
O20 3.288395 -3.108011 -0.381947  
H21 3.261261 -2.287575 -0.902535  
H22 2.640507 -2.846107 0.298970

O23 0.421465 4.658757 0.183348  
H24 0.795017 3.740584 0.181474  
H25 -0.425887 4.568737 -0.261480

[His-H]<sup>+</sup>(H<sub>2</sub>O)<sub>2</sub>\_21

O1 -2.271172 -0.740951 -0.723198  
C2 -1.988452 0.344211 -0.143564  
O3 -2.500608 0.808774 0.904797  
C4 -0.875475 1.227947 -0.797509  
N5 -1.242153 2.661123 -0.791726  
C6 0.476101 1.091350 -0.070240  
H7 -0.752033 0.910781 -1.836968  
H8 -1.652942 2.834066 0.126685  
C9 1.161633 -0.240145 -0.173787  
H10 1.146471 1.857778 -0.472185  
H11 0.319262 1.337637 0.988194  
C12 0.652016 -1.463488 -0.528570  
N13 1.711058 -2.348322 -0.444572  
C14 2.806743 -1.645642 -0.046664  
N15 2.512231 -0.375081 0.122109  
H16 -0.355639 -1.742804 -0.798714  
H17 1.667856 -3.337057 -0.628733  
H18 3.777178 -2.095448 0.098113  
H19 -2.012971 2.790358 -1.442823  
O20 -4.299391 -1.446740 1.155007  
H21 -3.936115 -0.600450 1.467904  
H22 -3.735608 -1.536561 0.363428  
O23 4.503272 1.504998 0.976185  
H24 4.003496 2.248136 1.325246  
H25 3.810900 0.875479 0.668844

[His-H]<sup>+</sup>(H<sub>2</sub>O)<sub>2</sub>\_22

O1 -0.222304 -1.930731 -1.711289  
C2 -0.903572 -1.433002 -0.790670  
O3 -1.643786 -2.047906 0.030317  
C4 -0.827546 0.127518 -0.632148  
N5 -2.151329 0.765442 -0.428660  
C6 0.082421 0.553517 0.534936  
H7 -0.415673 0.524804 -1.564275  
H8 -2.550057 0.433404 0.450962  
C9 1.552306 0.301268 0.359436  
H10 -0.052812 1.627035 0.705815  
H11 -0.267044 0.057086 1.449058  
C12 2.195510 -0.549941 -0.504603  
N13 3.543451 -0.395964 -0.239646  
C14 3.659984 0.527536 0.760082  
N15 2.483983 0.967903 1.142666  
H16 1.793499 -1.231481 -1.239425  
H17 4.294030 -0.882845 -0.701084  
H18 4.615196 0.837458 1.158024

H19 -2.785764 0.422985 -1.146570  
O20 -3.200716 -1.113982 1.967841  
H21 -2.639543 -1.506327 1.239336  
H22 -2.710667 -1.302263 2.772487  
O23 -2.130188 3.598263 -0.747513  
H24 -2.163606 2.615944 -0.609534  
H25 -1.228965 3.835996 -0.512357

[His-H]<sup>+</sup>(H<sub>2</sub>O)<sub>2</sub>\_23

O1 1.741011 -2.292618 0.089905  
C2 1.935094 -1.062108 -0.025605  
O3 2.611932 -0.480426 -0.921655  
C4 1.260967 -0.143138 1.054527  
N5 2.157954 0.882722 1.622180  
C6 0.019052 0.584691 0.507877  
H7 0.948245 -0.795664 1.875440  
H8 2.494729 1.481876 0.869132  
C9 -1.147829 -0.278902 0.127031  
H10 -0.311545 1.294515 1.274005  
H11 0.322470 1.184930 -0.359668  
C12 -1.204880 -1.634009 -0.079508  
N13 -2.518063 -1.905549 -0.417574  
C14 -3.200180 -0.727405 -0.406913  
N15 -2.406951 0.269676 -0.081607  
H16 -0.421125 -2.376003 -0.032903  
H17 -2.892572 -2.812300 -0.642879  
H18 -4.252555 -0.651551 -0.634655  
H19 2.987235 0.421347 1.986401  
O20 3.306455 2.066593 -1.262104  
H21 3.082161 1.100893 -1.138700  
H22 2.757914 2.338664 -2.002508

O23 -3.372821 2.968480 0.058005  
H24 -2.582153 3.508196 0.144985  
H25 -3.029344 2.046143 0.022691

[His-H]<sup>+</sup>(H<sub>2</sub>O)<sub>2</sub>\_24

O1 -1.686251 -2.538984 -0.268489  
C2 -1.978915 -1.481695 0.342695  
O3 -2.577807 -1.339557 1.434037  
C4 -1.536548 -0.131179 -0.339341  
N5 -2.578427 0.912862 -0.153927  
C6 -0.220107 0.410967 0.249506  
H7 -1.407198 -0.300274 -1.412017  
H8 -2.907627 0.774273 0.805536  
C9 1.022237 -0.375021 -0.055831  
H10 -0.068349 1.430432 -0.120991  
H11 -0.343680 0.491909 1.337666  
C12 1.157410 -1.681581 -0.451008  
N13 2.517790 -1.892402 -0.578944  
C14 3.150243 -0.729514 -0.260404  
N15 2.279713 0.204014 0.057027  
H16 0.396240 -2.431497 -0.617077  
H17 2.956051 -2.756559 -0.851896  
H18 4.223325 -0.614817 -0.279461  
H19 -3.378947 0.650857 -0.726061  
O20 -2.159855 3.636205 -0.880367  
H21 -2.281842 2.690758 -0.605172  
H22 -1.206377 3.754100 -0.913366  
O23 3.128440 2.821289 0.857696  
H24 2.817616 1.934370 0.562641  
H25 2.465122 3.101646 1.494386

**References**

1. M. Tomita, M. Irie and T. Ukita, *Biochem.*, 1969, **8**, 5149-5160.
2. P. Kang and C. S. Foote, *Tetrahedron Lett.*, 2000, **41**, 9623-9626.
3. M. J. Davies, *Biochem. Biophys. Res. Commun.*, 2003, **305**, 761-770.
4. V. V. Agon, W. A. Bubb, A. Wright, C. L. Hawkins and M. J. Davies, *Free Radical Biology & Medicine*, 2006, **40**, 698-710.
5. H.-S. Ryang and C. S. Foote, *J. Am. Chem. Soc.*, 1979, **101**, 6683-6687.
